# Supplementary material
Source: PubMed Central journal article supplement (PMC2834836)
Supplement: NIHMS171210-supplement-2.pdf [file NIHMS171210-supplement-2.pdf]

rank = rank based on false discovery analysis

<FP> = false positive rate

FDR = false discovery rate

log2 (ko/wt) = log scale 2 (mean ko std chow / mean wt std chow)

log 2 (koro/ko) = log scale 2 (mean ko ro chow / mean ko std chow)

log 2 ttest ko/wt = unpaired t-test for wt std chow (log2 wt1, log2 wt2, log2 wt3, log2 wt4) versus ko std chow (log2 ko1, log2 ko2, log2 ko3, log2 ko4)

log 2 ttest koro/ko = unpaired t-test for ko ro chow (log2 koro1, log2 koro2, log2 koro3, log2 koro4) versus ko std chow (log2 ko1, log2 ko2, log2 ko3, log2 ko4)

Acc = GenBank Accession number

Description = GenBank description

| rank | <FP>     | FDR      | log2 (ko/wt) | log2 (koro/ko) | log2 ttest ko/v | log2 ttest koro Acc | Description                                                                     |
|------|----------|----------|--------------|----------------|-----------------|---------------------|---------------------------------------------------------------------------------|
| 1    | 4.54E-11 | 4.54E-11 | -2.63        | 1.40           | 0.00            | 0.03 NM_007823      | cytochrome P450, family 4, subfamily b, polypeptide 1 (Cyp4b1)                  |
| 2    | 1.19E-10 | 5.96E-11 | -2.72        | -0.31          | 0.00            | 0.03 NM_021050      | cystic fibrosis transmembrane conductance regulator homolog (Cftr)              |
| 3    | 1.91E-09 | 6.35E-10 | -1.87        | -0.22          | 0.00            | 0.68 NM_029562      | cytochrome P450, family 2, subfamily d, polypeptide 26 (Cyp2d26)                |
| 4    | 1.62E-07 | 4.05E-08 | -1.48        | 0.20           | 0.00            | 0.30 NM_022434      | cytochrome P450, family 4, subfamily f, polypeptide 14 (Cyp4f14)                |
| 5    | 2.03E-07 | 4.07E-08 | -1.43        | 0.53           | 0.00            | 0.08 NM_025807      | solute carrier family 16 (monocarboxylic acid transporters), member 9 (Slc16a9) |
| 6    | 6.22E-07 | 1.04E-07 | -1.35        | -0.29          | 0.00            | 0.10 NM_029562      | cytochrome P450, family 2, subfamily d, polypeptide 26 (Cyp2d26)                |
| 7    | 6.87E-07 | 9.81E-08 | -1.36        | -0.13          | 0.00            | 0.43 NM_019545      | hydroxyacid oxidase (glycolate oxidase) 3 (Hao3)                                |
| 8    | 9.13E-07 | 1.14E-07 | -1.28        | -0.01          | 0.00            | 0.99 NM_007819      | cytochrome P450, family 3, subfamily a, polypeptide 13 (Cyp3a13)                |
| 9    | 1.57E-06 | 1.74E-07 | -1.25        | 0.09           | 0.00            | 0.67 NM_007819      | cytochrome P450, family 3, subfamily a, polypeptide 13 (Cyp3a13)                |
| 10   | 2.03E-06 | 2.03E-07 | -1.25        | 0.06           | 0.00            | 0.71 NM_033603      | amnionless (Amn)                                                                |
| 11   | 2.14E-06 | 1.94E-07 | -1.20        | 0.06           | 0.00            | 0.55 NM_011169      | prolactin receptor (Prlr)                                                       |
| 12   | 2.19E-06 | 1.82E-07 | -1.28        | 0.37           | 0.00            | 0.07 NM_173404      | bone morphogenetic protein 3 (Bmp3)                                             |
| 13   | 2.30E-06 | 1.77E-07 | -1.18        | 0.15           | 0.00            | 0.45 NM_053078      | DNA segment, human D4S114 (D0H4S114)                                            |
| 14   | 6.62E-06 | 4.73E-07 | -1.21        | 0.29           | 0.01            | 0.27 NM_024435      | neurotensin (Nts)                                                               |
| 15   | 1.40E-05 | 9.30E-07 | -1.29        | 0.18           | 0.00            | 0.34 NM_026716      | syncollin (Syncn)                                                               |
| 16   | 1.42E-05 | 8.33E-07 | -1.22        | -0.20          | 0.00            | 0.62 NM_133670      | sulfotransferase family 1A, phenol-preferring, member 1 (Sult1a1)               |
| 17   | 1.42E-05 | 8.33E-07 | -1.34        | 0.96           | 0.02            | 0.46 NM_010378      | histocompatibility 2, class II antigen A, alpha (H2-Aa)                         |
| 18   | 1.62E-05 | 9.02E-07 | -1.31        | 0.31           | 0.01            | 0.37 NM_153506      | C lectin-related protein A (Clra)                                               |
| 19   | 2.19E-05 | 1.15E-06 | -0.98        | 0.04           | 0.00            | 0.71 NM_012033      | tubulointerstitial nephritis antigen (Tinag)                                    |
| 20   | 2.32E-05 | 1.16E-06 | -0.99        | -0.45          | 0.02            | 0.27 NM_010005      | cytochrome P450, family 2, subfamily d, polypeptide 10 (Cyp2d10)                |
| 21   | 2.41E-05 | 1.15E-06 | -1.03        | -0.42          | 0.00            | 0.12 NM_145146      | afamin (Afm)                                                                    |
| 22   | 2.48E-05 | 1.13E-06 | -1.09        | -0.03          | 0.01            | 0.89 NM_145419      | cDNA sequence BC016235 (BC016235)                                               |
| 23   | 4.19E-05 | 1.82E-06 | -1.02        | -0.07          | 0.00            | 0.77 NM_173735      | RIKEN cDNA 2310044G17 gene (2310044G17Rik)                                      |
| 24   | 5.27E-05 | 2.19E-06 | -1.05        | 0.27           | 0.01            | 0.26 NM_008100      | glucagon (Gcg)                                                                  |
| 25   | 7.10E-05 | 2.84E-06 | -1.39        | -0.48          | 0.00            | 0.14 NM_011315      | serum amyloid A 3 (Saa3)                                                        |
| 26   | 7.55E-05 | 2.90E-06 | -0.88        | -0.08          | 0.00            | 0.61 NM_028270      | aldehyde dehydrogenase 1 family, member B1 (Aldh1b1)                            |
| 27   | 8.18E-05 | 3.03E-06 | -1.10        | -0.34          | 0.01            | 0.34 NM_008585      | meprin 1 alpha (Mep1a)                                                          |
| 28   | 1.04E-04 | 3.72E-06 | -0.93        | 0.41           | 0.00            | 0.13 NM_009205      | solute carrier family 3, member 1 (Slc3a1)                                      |
| 29   | 1.41E-04 | 4.87E-06 | -0.99        | 0.70           | 0.01            | 0.37 NM_207105      | histocompatibility 2, class II antigen A, beta 1 (H2-Ab1)                       |
| 30   | 1.46E-04 | 4.87E-06 | -0.89        | 0.14           | 0.00            | 0.33 NM_027286      | angiotensin I converting enzyme (peptidyl-dipeptidase A) 2 (Ace2)               |
| 31   | 1.66E-04 | 5.35E-06 | -0.91        | 0.33           | 0.01            | 0.23 NM_007876      | dipeptidase 1 (renal) (Dpep1)                                                   |
| 32   | 1.67E-04 | 5.23E-06 | -0.90        | -0.15          | 0.00            | 0.42 NM_144930      | expressed sequence AU018778 (AU018778)                                          |
| 33   | 1.77E-04 | 5.21E-06 | -0.91        | -0.48          | 0.00            | 0.01 NM_145079      | UDP glycosyltransferase 1 family, polypeptide A6 (Ugt1a6)                       |
| 34   | 1.77E-04 | 5.21E-06 | -0.82        | 0.11           | 0.00            | 0.48 NM_009202      | solute carrier family 22 (organic cation transporter), member 1 (Slc22a1)       |

|    |          |          |       |       |      |      |           |                                                                                    |
|----|----------|----------|-------|-------|------|------|-----------|------------------------------------------------------------------------------------|
| 35 | 1.97E-04 | 5.63E-06 | -0.97 | 1.14  | 0.02 | 0.21 | NM_207105 | response to metastatic cancers 1 (Rmcs1)                                           |
| 36 | 2.16E-04 | 6.01E-06 | -0.93 | -0.11 | 0.05 | 0.93 | NM_145932 | RIKEN cDNA D630035O19 gene (D630035O19Rik)                                         |
| 37 | 2.52E-04 | 6.81E-06 | -0.90 | -0.03 | 0.01 | 0.99 | NM_010893 | neuraminidase 1 (Neu1)                                                             |
| 38 | 2.76E-04 | 7.25E-06 | -0.88 | -0.46 | 0.00 | 0.02 | NM_009178 | sialyltransferase 4C (beta-galactoside alpha-2,3-sialyltransferase) (Siat4c)       |
| 39 | 2.80E-04 | 7.17E-06 | -1.01 | 1.28  | 0.02 | 0.21 | NM_010545 | Ia-associated invariant chain (Ii)                                                 |
| 40 | 2.90E-04 | 7.07E-06 | -0.95 | -0.29 | 0.00 | 0.10 | NM_021456 | carboxylesterase 1 (Ces1)                                                          |
| 41 | 2.90E-04 | 7.07E-06 | -1.49 | -0.37 | 0.01 | 0.27 | NM_008630 | metallothionein 2 (Mt2)                                                            |
| 42 | 3.01E-04 | 7.16E-06 | -0.84 | 1.01  | 0.02 | 0.19 | NM_010379 | histocompatibility 2, class II antigen A, beta 1 (H2-Ab1)                          |
| 43 | 3.25E-04 | 7.56E-06 | -0.91 | -0.12 | 0.02 | 0.69 | NM_007860 | deiodinase, iodothyronine, type I (Dio1)                                           |
| 44 | 3.32E-04 | 7.54E-06 | -0.76 | 0.33  | 0.03 | 0.23 | NM_019823 | cytochrome P450, family 2, subfamily d, polypeptide 22 (Cyp2d22)                   |
| 45 | 4.10E-04 | 9.11E-06 | -0.77 | -0.08 | 0.00 | 0.63 | NM_007410 | alcohol dehydrogenase 5 (class III), chi polypeptide (Adh5)                        |
| 46 | 4.46E-04 | 9.70E-06 | -1.03 | -0.23 | 0.02 | 0.68 | NM_026085 | RIKEN cDNA 3110049J23 gene (3110049J23Rik)                                         |
| 47 | 4.95E-04 | 1.05E-05 | -0.83 | 0.72  | 0.00 | 0.00 | NM_020043 | neighbor of Punc E11 (Nope)                                                        |
| 48 | 5.60E-04 | 1.17E-05 | -0.88 | -0.11 | 0.01 | 0.87 | NM_011542 | transcription elongation factor A (SII), 3 (Tcea3)                                 |
| 49 | 5.85E-04 | 1.19E-05 | -0.81 | 0.87  | 0.01 | 0.13 | NM_010382 | histocompatibility 2, class II antigen E beta (H2-Eb1)                             |
| 50 | 6.32E-04 | 1.26E-05 | -0.83 | -0.15 | 0.01 | 0.62 | NM_020332 | progressive ankylosis (Ank)                                                        |
| 51 | 6.63E-04 | 1.30E-05 | -0.81 | -0.24 | 0.00 | 0.01 | NM_007819 | cytochrome P450, family 3, subfamily a, polypeptide 13 (Cyp3a13)                   |
| 52 | 6.67E-04 | 1.28E-05 | -0.87 | -0.53 | 0.00 | 0.00 | NM_201410 | UDP glucuronosyltransferase 1 family, polypeptide A6B (Ugt1a6b)                    |
| 53 | 8.19E-04 | 1.55E-05 | -0.80 | 0.06  | 0.00 | 0.54 | NM_011674 | UDP-glucuronosyltransferase 8 (Ugt8)                                               |
| 54 | 1.07E-03 | 1.98E-05 | -0.83 | 0.70  | 0.01 | 0.07 | XM_131801 | cytidine deaminase (Cda)                                                           |
| 55 | 1.15E-03 | 2.10E-05 | -1.58 | -0.23 | 0.01 | 0.77 | NM_009155 | selenoprotein P, plasma, 1 (Sepp1)                                                 |
| 56 | 1.21E-03 | 2.17E-05 | -0.67 | 0.19  | 0.00 | 0.10 | NM_146139 | vav 3 oncogene (Vav3)                                                              |
| 57 | 1.28E-03 | 2.25E-05 | -0.75 | -0.05 | 0.01 | 0.77 | NM_029614 | RIKEN cDNA 2310046G15 gene (2310046G15Rik)                                         |
| 58 | 1.32E-03 | 2.28E-05 | -0.68 | 0.12  | 0.00 | 0.49 | NM_028051 | solute carrier family 39 (metal ion transporter), member 5 (Slc39a5)               |
| 59 | 1.49E-03 | 2.53E-05 | -0.85 | -0.10 | 0.02 | 0.89 | NM_007472 | aquaporin 1 (Aqp1)                                                                 |
| 60 | 1.57E-03 | 2.62E-05 | -0.95 | 0.03  | 0.01 | 0.74 | NM_013602 | metallothionein 1 (Mt1)                                                            |
| 61 | 1.99E-03 | 3.26E-05 | -0.63 | -0.14 | 0.00 | 0.32 | NM_177870 | solute carrier family 5 (sodium-dependent vitamin transporter), member 6 (Slc5a6)  |
| 62 | 2.09E-03 | 3.37E-05 | -0.68 | -0.27 | 0.00 | 0.01 | NM_153598 | expressed sequence AI788959 (AI788959)                                             |
| 63 | 2.13E-03 | 3.37E-05 | -0.65 | 0.41  | 0.01 | 0.03 | NM_177564 | cDNA sequence BC022224 (BC022224)                                                  |
| 64 | 2.29E-03 | 3.58E-05 | -0.69 | 0.30  | 0.01 | 0.08 | NM_133946 | NACHT, leucine rich repeat and PYD containing 6 (Nalp6)                            |
| 65 | 2.33E-03 | 3.58E-05 | -0.68 | -0.08 | 0.00 | 0.59 | NM_133960 | RIKEN cDNA 9130231C15 gene (9130231C15Rik)                                         |
| 66 | 2.39E-03 | 3.62E-05 | -1.46 | 0.52  | 0.04 | 0.24 | NM_008256 | 3-hydroxy-3-methylglutaryl-Coenzyme A synthase 2 (Hmgcs2)                          |
| 67 | 2.44E-03 | 3.64E-05 | -0.64 | 0.69  | 0.01 | 0.01 | XM_355937 |                                                                                    |
| 68 | 2.55E-03 | 3.75E-05 | -0.72 | 0.03  | 0.01 | 0.75 | NM_007694 | chromogranin B (Chgb)                                                              |
| 69 | 2.95E-03 | 4.28E-05 | -0.67 | 1.11  | 0.04 | 0.00 | NM_009034 | retinol binding protein 2, cellular (Rbp2)                                         |
| 70 | 4.22E-03 | 6.03E-05 | -0.63 | -0.36 | 0.00 | 0.01 | NM_023383 | arylacetamide deacetylase (esterase) (Aadac)                                       |
| 71 | 4.51E-03 | 6.35E-05 | -0.65 | -0.02 | 0.00 | 0.73 | NM_172928 | doublecortin-like kinase 3 (Dclk3)                                                 |
| 72 | 4.83E-03 | 6.70E-05 | -0.63 | -0.12 | 0.01 | 0.58 | NM_021719 | claudin 15 (Cldn15)                                                                |
| 73 | 4.90E-03 | 6.71E-05 | -0.65 | 0.09  | 0.03 | 0.63 | NM_015747 | solute carrier family 20, member 1 (Slc20a1)                                       |
| 74 | 5.18E-03 | 7.00E-05 | -0.86 | 0.27  | 0.05 | 0.40 | NM_028089 | cytochrome P450, family 2, subfamily c, polypeptide 55 (Cyp2c55)                   |
| 75 | 5.20E-03 | 6.84E-05 | -0.61 | 0.29  | 0.00 | 0.09 | NM_010023 | dodecenoyl-Coenzyme A delta isomerase (3,2 trans-enoyl-Coenzyme A isomerase) (Dci) |
| 76 | 5.20E-03 | 6.84E-05 | -0.63 | -0.04 | 0.01 | 0.77 | NM_010239 | ferritin heavy chain 1 (Fth1)                                                      |
| 77 | 5.42E-03 | 7.04E-05 | -0.82 | -0.17 | 0.03 | 0.77 | NM_007902 | endothelin 2 (Edn2)                                                                |
| 78 | 6.09E-03 | 7.81E-05 | -0.69 | 0.29  | 0.01 | 0.22 | NM_183251 | RIKEN cDNA 1810020D17 gene (1810020D17Rik)                                         |
| 79 | 6.76E-03 | 8.55E-05 | -0.86 | 0.15  | 0.02 | 0.38 | NM_025655 | RIKEN cDNA 2010002A20 gene (2010002A20Rik)                                         |
| 80 | 6.85E-03 | 8.56E-05 | -0.62 | -0.23 | 0.00 | 0.01 | NM_012033 | tubulointerstitial nephritis antigen (Tinag)                                       |

|     |          |          |       |       |      |      |           |                                                                                 |
|-----|----------|----------|-------|-------|------|------|-----------|---------------------------------------------------------------------------------|
| 81  | 7.05E-03 | 8.70E-05 | -0.82 | -0.35 | 0.01 | 0.14 | NM_011314 | serum amyloid A 2 (Saa2)                                                        |
| 82  | 7.91E-03 | 9.65E-05 | -0.59 | 0.07  | 0.00 | 0.25 | XM_130038 | cubilin (intrinsic factor-cobalamin receptor) (Cubn)                            |
| 83  | 8.30E-03 | 1.00E-04 | -1.13 | 0.60  | 0.04 | 0.09 | NM_009475 | proline-rich acidic protein 1 (Prap1)                                           |
| 84  | 8.75E-03 | 1.04E-04 | -0.58 | -0.19 | 0.00 | 0.01 | NM_007670 | cyclin-dependent kinase inhibitor 2B (p15, inhibits CDK4) (Cdkn2b)              |
| 85  | 8.80E-03 | 1.04E-04 | -0.75 | 0.33  | 0.02 | 0.08 | NM_011406 | solute carrier family 8 (sodium/calcium exchanger), member 1 (Slc8a1)           |
| 86  | 9.88E-03 | 1.15E-04 | -0.66 | 0.54  | 0.00 | 0.00 | NM_007647 | ectonucleoside triphosphate diphosphohydrolase 5 (Entpd5)                       |
| 87  | 9.97E-03 | 1.15E-04 | -0.91 | -0.55 | 0.02 | 0.17 | NM_009117 | serum amyloid A 1 (Saa1)                                                        |
| 88  | 1.00E-02 | 1.14E-04 | -0.71 | 0.51  | 0.03 | 0.04 | NM_007607 | carbonic anhydrase 4 (Car4)                                                     |
| 89  | 1.07E-02 | 1.20E-04 | -0.71 | -0.22 | 0.01 | 0.16 | NM_008116 | gamma-glutamyltransferase 1 (Ggt1)                                              |
| 90  | 1.20E-02 | 1.33E-04 | -0.54 | 0.37  | 0.00 | 0.02 | NM_026362 | RIKEN cDNA 5033414D02 gene (5033414D02Rik)                                      |
| 91  | 1.34E-02 | 1.47E-04 | -0.57 | 0.38  | 0.00 | 0.02 | NM_172692 | glucosidase beta 2 (Gba2)                                                       |
| 92  | 1.36E-02 | 1.47E-04 | -0.53 | -0.11 | 0.01 | 0.55 | NM_026752 | zinc finger, FYVE domain containing 21 (Zfyve21)                                |
| 93  | 1.37E-02 | 1.47E-04 | -0.61 | -0.03 | 0.01 | 0.88 | NM_009421 | Tnf receptor-associated factor 1 (Traf1)                                        |
| 94  | 1.38E-02 | 1.47E-04 | -0.65 | -0.40 | 0.00 | 0.00 | NM_145558 | hydroxyacyl-Coenzyme A dehydrogenase/3-ketoacyl-Coenzyme A thiolase/ (Hadhb)    |
| 95  | 1.39E-02 | 1.46E-04 | -0.56 | 0.18  | 0.00 | 0.13 | NM_013670 | small nuclear ribonucleoprotein N (Snrpn)                                       |
| 96  | 1.42E-02 | 1.48E-04 | -0.73 | 0.61  | 0.01 | 0.00 | NM_133732 | RIKEN cDNA 4931406C07 gene (4931406C07Rik)                                      |
| 97  | 1.42E-02 | 1.47E-04 | -0.67 | -0.34 | 0.00 | 0.02 | NM_145079 | UDP glycosyltransferase 1 family, polypeptide A6 (Ugt1a6)                       |
| 98  | 1.52E-02 | 1.56E-04 | -0.70 | 0.48  | 0.02 | 0.01 | NM_011905 | toll-like receptor 2 (Tlr2)                                                     |
| 99  | 1.53E-02 | 1.55E-04 | -0.76 | 0.21  | 0.00 | 0.18 | NM_023480 | fumarylacetoacetate hydrolase domain containing 1 (Fahd1)                       |
| 100 | 1.65E-02 | 1.63E-04 | -0.74 | 0.45  | 0.00 | 0.05 | NM_009504 | vitamin D receptor (Vdr)                                                        |
| 101 | 1.65E-02 | 1.63E-04 | -0.68 | 0.96  | 0.00 | 0.00 | NM_027239 | RIKEN cDNA 1810065E05 gene (1810065E05Rik)                                      |
| 102 | 1.86E-02 | 1.83E-04 | -0.51 | 0.00  | 0.03 | 0.95 | NM_008918 | pancreatic polypeptide (Ppy)                                                    |
| 103 | 1.91E-02 | 1.85E-04 | -0.49 | -0.21 | 0.00 | 0.06 | NM_023270 | ring finger protein 128 (Rnf128)                                                |
| 104 | 2.01E-02 | 1.93E-04 | -0.64 | -0.84 | 0.01 | 0.00 | NM_019769 | RIKEN cDNA 1500003O03 gene (1500003O03Rik)                                      |
| 105 | 2.08E-02 | 1.98E-04 | -0.75 | 0.31  | 0.01 | 0.16 | NM_182805 | glutamic pyruvic transaminase 1, soluble (Gpt1)                                 |
| 106 | 2.12E-02 | 2.00E-04 | -0.64 | 0.25  | 0.01 | 0.05 | NM_008509 | lipoprotein lipase (Lpl)                                                        |
| 107 | 2.19E-02 | 2.05E-04 | -0.48 | 0.02  | 0.00 | 0.86 | NM_025337 | aldo-keto reductase family 7, member A5 (aflatoxin aldehyde reductase) (Akr7a5) |
| 108 | 2.20E-02 | 2.04E-04 | -0.52 | 0.40  | 0.10 | 0.16 | NM_009944 | cytochrome c oxidase, subunit VIIa 1 (Cox7a1)                                   |
| 109 | 2.21E-02 | 2.03E-04 | -0.66 | 0.40  | 0.03 | 0.16 | NM_019414 | selenium binding protein 2 (Selenbp2)                                           |
| 110 | 2.29E-02 | 2.08E-04 | -0.58 | 0.36  | 0.05 | 0.16 | NM_138670 | mercaptopyruvate sulfurtransferase (Mpst)                                       |
| 111 | 2.35E-02 | 2.12E-04 | -0.74 | 0.51  | 0.01 | 0.00 | NM_013467 | aldehyde dehydrogenase family 1, subfamily A1 (Aldh1a1)                         |
| 112 | 2.39E-02 | 2.13E-04 | -0.75 | -0.13 | 0.04 | 0.90 | NM_009132 | scinderin (Scin)                                                                |
| 113 | 2.55E-02 | 2.25E-04 | -0.61 | 0.17  | 0.02 | 0.39 | XM_129951 | RIKEN cDNA 2010001C14 gene (2010001C14Rik)                                      |
| 114 | 2.66E-02 | 2.33E-04 | -0.66 | -0.80 | 0.01 | 0.00 | NM_019769 | RIKEN cDNA 1500003O03 gene (1500003O03Rik)                                      |
| 115 | 3.64E-02 | 3.16E-04 | -0.76 | 0.41  | 0.11 | 0.38 | NM_011328 | secretin (Sct)                                                                  |
| 116 | 3.82E-02 | 3.29E-04 | -0.47 | -0.28 | 0.08 | 0.23 | NM_009366 | transforming growth factor beta 1 induced transcript 4 (Tgfb14)                 |
| 117 | 4.00E-02 | 3.42E-04 | -0.57 | -0.36 | 0.00 | 0.03 | NM_033174 | SNRPN upstream reading frame (Snurf)                                            |
| 118 | 4.13E-02 | 3.50E-04 | -0.58 | -0.07 | 0.01 | 0.72 | NM_016710 | nucleosome binding protein 1 (Nsbp1)                                            |
| 119 | 4.44E-02 | 3.73E-04 | -0.51 | 0.08  | 0.02 | 0.55 | NM_009215 | somatostatin (Sst)                                                              |
| 120 | 4.71E-02 | 3.92E-04 | -0.49 | 0.41  | 0.02 | 0.02 | NM_007408 | adipose differentiation related protein (Adfp)                                  |
| 121 | 4.87E-02 | 4.03E-04 | -0.72 | 0.54  | 0.02 | 0.00 | NM_009705 | arginase type II (Arg2)                                                         |
| 122 | 4.90E-02 | 4.02E-04 | -0.44 | 0.22  | 0.02 | 0.09 | NM_024236 | quininoid dihydropteridine reductase (Qdpr)                                     |
| 123 | 5.44E-02 | 4.43E-04 | -0.87 | 0.38  | 0.04 | 0.18 | NM_029360 | transmembrane 4 superfamily member 5 (Tm4sf5)                                   |
| 124 | 5.96E-02 | 4.81E-04 | -0.81 | -0.03 | 0.03 | 0.88 | NM_016771 | sulfotransferase family 1D, member 1 (Sult1d1)                                  |
| 125 | 7.30E-02 | 5.84E-04 | -0.51 | -0.11 | 0.00 | 0.50 | NM_027865 | transmembrane protein 25 (Tmem25)                                               |
| 126 | 7.41E-02 | 5.88E-04 | -0.50 | 0.45  | 0.03 | 0.06 | NM_009876 | cyclin-dependent kinase inhibitor 1C (P57) (Cdkn1c)                             |

|     |          |          |       |       |      |      |           |                                                                                     |
|-----|----------|----------|-------|-------|------|------|-----------|-------------------------------------------------------------------------------------|
| 127 | 7.60E-02 | 5.98E-04 | -0.65 | -0.08 | 0.02 | 0.79 | NM_007706 | suppressor of cytokine signaling 2 (Socs2)                                          |
| 128 | 7.68E-02 | 6.00E-04 | -0.60 | 0.76  | 0.06 | 0.01 | NM_009366 | transforming growth factor beta 1 induced transcript 4 (Tgfb1i4)                    |
| 129 | 7.76E-02 | 6.02E-04 | -0.69 | 0.15  | 0.04 | 0.47 | NM_177016 | RIKEN cDNA 9130214H05 gene (9130214H05Rik)                                          |
| 130 | 7.89E-02 | 6.07E-04 | -0.59 | 0.06  | 0.06 | 0.64 | NM_133969 | cytochrome P450, family 4, subfamily v, polypeptide 3 (Cyp4v3)                      |
| 131 | 8.33E-02 | 6.36E-04 | -0.42 | -0.11 | 0.00 | 0.12 | NM_010195 | G protein-coupled receptor 49 (Gpr49)                                               |
| 132 | 8.38E-02 | 6.35E-04 | -0.48 | -0.05 | 0.00 | 0.36 | NM_008772 | purinergic receptor P2Y, G-protein coupled 1 (P2ry1)                                |
| 133 | 8.68E-02 | 6.52E-04 | -0.46 | 0.08  | 0.00 | 0.19 | NM_145558 | hydroxyacyl-Coenzyme A dehydrogenase/3-ketoacyl-Coenzyme A thiolase/enoyl-t (Hadhb) |
| 134 | 9.15E-02 | 6.83E-04 | -0.70 | 0.35  | 0.02 | 0.11 | NM_178711 | phospholipid scramblase 4 (Plscr4)                                                  |
| 135 | 9.60E-02 | 7.11E-04 | -0.72 | -0.19 | 0.01 | 0.20 | NM_145519 | FERM, RhoGEF and pleckstrin domain protein 2 (Farp2)                                |
| 136 | 0.1      | 7.72E-04 | -0.66 | -0.21 | 0.05 | 0.59 | NM_020268 | kallikrein 27 (Klk27)                                                               |
| 137 | 0.11     | 7.84E-04 | -0.43 | -0.03 | 0.00 | 0.67 | NM_010074 | dipeptidylpeptidase 4 (Dpp4)                                                        |
| 138 | 0.11     | 7.92E-04 | -0.43 | 0.18  | 0.07 | 0.31 | NM_053122 | inner mitochondrial membrane peptidase 2-like (S. cerevisiae) (Immp2l)              |
| 139 | 0.11     | 8.25E-04 | -0.46 | 0.15  | 0.01 | 0.30 | NM_024284 | hydroxyacyl glutathione hydrolase (Hagh)                                            |
| 140 | 0.12     | 8.36E-04 | -0.83 | -0.07 | 0.01 | 0.88 | NM_011170 | prion protein (Prnp)                                                                |
| 141 | 0.12     | 8.34E-04 | -0.60 | 0.43  | 0.05 | 0.14 | NM_009150 | selenium binding protein 1 (Selenbp1)                                               |
| 142 | 0.13     | 8.95E-04 | -0.75 | 0.22  | 0.08 | 0.47 | NM_021481 | trehalase (brush-border membrane glycoprotein) (Treh)                               |
| 143 | 0.14     | 9.65E-04 | -0.41 | 0.22  | 0.01 | 0.02 | NM_011068 | peroxisomal biogenesis factor 11a (Pex11a)                                          |
| 144 | 0.16     | 1.13E-03 | -0.81 | -0.06 | 0.12 | 0.90 | NM_017474 | chloride channel calcium activated 3 (Clca3)                                        |
| 145 | 0.17     | 1.14E-03 | -0.38 | -0.11 | 0.00 | 0.04 | NM_019810 | solute carrier family 5 (sodium/glucose cotransporter), member 1 (Slc5a1)           |
| 146 | 0.17     | 1.18E-03 | -0.47 | 0.46  | 0.02 | 0.02 | NM_201410 | UDP glucuronosyltransferase 1 family, polypeptide A6B (Ugt1a6b)                     |
| 147 | 0.18     | 1.25E-03 | -0.39 | -0.22 | 0.00 | 0.03 | NM_013670 | small nuclear ribonucleoprotein N (Snrpn)                                           |
| 148 | 0.18     | 1.25E-03 | -0.37 | 0.21  | 0.01 | 0.03 | NM_021534 | peroxisomal membrane protein 4 (Pmp4)                                               |
| 149 | 0.19     | 1.25E-03 | -0.52 | 0.07  | 0.01 | 0.63 | NM_011696 | voltage-dependent anion channel 3 (Vdac3)                                           |
| 150 | 0.2      | 1.34E-03 | -0.47 | -0.19 | 0.01 | 0.16 | NM_009752 | galactosidase, beta 1 (Glb1)                                                        |
| 151 | 0.22     | 1.44E-03 | -0.54 | 0.63  | 0.02 | 0.01 | NM_016772 | enoyl coenzyme A hydratase 1, peroxisomal (Ech1)                                    |
| 152 | 0.22     | 1.47E-03 | -0.49 | 0.46  | 0.02 | 0.03 | NM_201642 | UDP glucuronosyltransferase 1 family, polypeptide A7C (Ugt1a7c)                     |
| 153 | 0.23     | 1.47E-03 | -0.38 | -0.12 | 0.00 | 0.08 | NM_009302 | SWAP complex protein (Swap70)                                                       |
| 154 | 0.24     | 1.53E-03 | -0.44 | 0.04  | 0.00 | 0.57 | NM_177595 | RIKEN cDNA 9430023B20 gene (9430023B20Rik)                                          |
| 155 | 0.25     | 1.59E-03 | -0.40 | 0.15  | 0.00 | 0.08 | NM_146466 | olfactory receptor 165 (Olfr165)                                                    |
| 156 | 0.25     | 1.58E-03 | -0.38 | 0.17  | 0.01 | 0.18 | NM_009202 | solute carrier family 22 (organic cation transporter), member 1 (Slc22a1)           |
| 157 | 0.28     | 1.75E-03 | -0.69 | 0.22  | 0.00 | 0.07 | NM_008587 | c-mer proto-oncogene tyrosine kinase (Mertk)                                        |
| 158 | 0.28     | 1.75E-03 | -0.67 | 0.46  | 0.00 | 0.00 | NM_172759 | RIKEN cDNA 9030624L02 gene (9030624L02Rik)                                          |
| 159 | 0.29     | 1.80E-03 | -0.67 | -0.36 | 0.00 | 0.02 | NM_008212 | L-3-hydroxyacyl-Coenzyme A dehydrogenase, short chain (Hadhsc)                      |
| 160 | 0.29     | 1.79E-03 | -0.92 | -0.02 | 0.02 | 0.98 | XM_150350 |                                                                                     |
| 161 | 0.29     | 1.78E-03 | -0.43 | 0.44  | 0.04 | 0.02 | NM_013535 | gene rich cluster, C10 gene (Grcc10)                                                |
| 162 | 0.29     | 1.81E-03 | -0.40 | -0.04 | 0.04 | 0.90 | NM_170689 | ankyrin 3, epithelial (Ank3), transcript variant 4                                  |
| 163 | 0.29     | 1.80E-03 | -0.57 | -0.33 | 0.04 | 0.20 | NM_177912 | expressed sequence AI987692 (AI987692)                                              |
| 164 | 0.32     | 1.92E-03 | -0.36 | 0.09  | 0.00 | 0.24 | NM_013839 | nuclear receptor subfamily 1, group H, member 3 (Nr1h3)                             |
| 165 | 0.32     | 1.95E-03 | -0.45 | 0.26  | 0.01 | 0.01 | NM_026947 | RIKEN cDNA 1810022C23 gene (1810022C23Rik)                                          |
| 166 | 0.32     | 1.94E-03 | -0.41 | -0.28 | 0.01 | 0.03 | NM_007860 | deiodinase, iodothyronine, type I (Dio1)                                            |
| 167 | 0.34     | 2.01E-03 | -0.37 | 0.42  | 0.00 | 0.00 | NM_053155 | calmin (Clmn)                                                                       |
| 168 | 0.34     | 2.01E-03 | -0.35 | 0.13  | 0.02 | 0.29 | NM_053177 | mucolipin 1 (Mcoln1)                                                                |
| 169 | 0.34     | 2.01E-03 | -0.68 | 0.61  | 0.02 | 0.01 | XM_129243 | cytochrome P450, family 2, subfamily c, polypeptide 66 (Cyp2c66)                    |
| 170 | 0.36     | 2.12E-03 | -0.51 | 0.37  | 0.01 | 0.00 | NM_201641 | UDP glycosyltransferase 1 family, polypeptide A10 (Ugt1a10)                         |
| 171 | 0.37     | 2.19E-03 | -0.56 | 0.49  | 0.01 | 0.02 | NM_134007 | DNA segment, Chr 10, ERATO Doi 214, expressed (D10Ert214e)                          |
| 172 | 0.42     | 2.42E-03 | -0.48 | 0.66  | 0.02 | 0.00 | NM_145079 | UDP glycosyltransferase 1 family, polypeptide A6 (Ugt1a6)                           |

|     |      |          |       |       |      |      |           |                                                                                      |
|-----|------|----------|-------|-------|------|------|-----------|--------------------------------------------------------------------------------------|
| 173 | 0.52 | 3.01E-03 | -0.35 | -0.19 | 0.13 | 0.40 | NM_009374 | transglutaminase 3, E polypeptide (Tgm3)                                             |
| 174 | 0.53 | 3.05E-03 | -0.40 | 0.20  | 0.02 | 0.17 | NM_011353 | small EDRK-rich factor 1 (Serf1)                                                     |
| 175 | 0.55 | 3.15E-03 | -0.38 | 0.01  | 0.02 | 0.86 | NM_021304 | abhydrolase domain containing 1 (Abhd1)                                              |
| 176 | 0.56 | 3.19E-03 | -0.39 | -0.06 | 0.00 | 0.48 | NM_028493 | Rho-related BTB domain containing 3 (Rhobtb3)                                        |
| 177 | 0.57 | 3.24E-03 | -0.33 | 0.12  | 0.06 | 0.34 | XM_128511 | RIKEN cDNA 0610011F06 gene (0610011F06Rik)                                           |
| 178 | 0.6  | 3.35E-03 | -0.95 | 0.37  | 0.02 | 0.20 | XM_125703 | RIKEN cDNA 2210404O07 gene (2210404O07Rik)                                           |
| 179 | 0.66 | 3.69E-03 | -0.51 | 0.24  | 0.01 | 0.09 | NM_027211 | annexin A13 (Anxa13)                                                                 |
| 180 | 0.71 | 3.92E-03 | -0.60 | 0.06  | 0.05 | 0.69 | NM_008456 | kallikrein 5 (Klk5)                                                                  |
| 181 | 0.78 | 4.32E-03 | -0.43 | 0.30  | 0.03 | 0.01 | NM_029643 | G protein-coupled receptor 172B (Gpr172b)                                            |
| 182 | 0.8  | 4.38E-03 | -0.37 | -0.19 | 0.01 | 0.13 | NM_009907 | ceroid lipofuscinosis, neuronal 3, juvenile (Batten, Spielmeier-Vogt disease) (Cln3) |
| 183 | 0.81 | 4.44E-03 | -0.65 | 0.08  | 0.05 | 0.60 | NM_020268 | kallikrein 27 (Klk27)                                                                |
| 184 | 0.84 | 4.54E-03 | -0.78 | 0.26  | 0.01 | 0.16 | NM_009504 | vitamin D receptor (Vdr)                                                             |
| 185 | 0.84 | 4.54E-03 | -0.45 | -0.03 | 0.00 | 0.76 | NM_172668 | low density lipoprotein receptor-related protein 4 (Lrp4)                            |
| 186 | 0.85 | 4.59E-03 | -0.55 | -0.08 | 0.02 | 0.76 | NM_178779 | ring finger protein 152 (Rnf152), transcript variant 1                               |
| 187 | 0.89 | 4.75E-03 | -0.42 | 0.20  | 0.01 | 0.32 | NM_009735 | beta-2 microglobulin (B2m)                                                           |
| 188 | 0.9  | 4.76E-03 | -0.40 | -0.05 | 0.02 | 0.77 | NM_025458 | RIKEN cDNA 1810015P03 gene (1810015P03Rik)                                           |
| 189 | 0.9  | 4.76E-03 | -0.39 | 0.11  | 0.01 | 0.18 | NM_027227 | RIKEN cDNA 2010001H14 gene (2010001H14Rik)                                           |
| 190 | 0.91 | 4.80E-03 | -0.39 | -0.15 | 0.00 | 0.04 | NM_170755 | cDNA sequence BC038286 (BC038286)                                                    |
| 191 | 0.94 | 4.93E-03 | -0.51 | -0.02 | 0.03 | 0.91 | NM_020277 | transient receptor potential cation channel, subfamily M, member 5 (Trpm5)           |
| 192 | 0.94 | 4.91E-03 | -0.40 | 0.30  | 0.15 | 0.24 | NM_025469 | colipase, pancreatic (Clps)                                                          |
| 193 | 0.94 | 4.89E-03 | -0.32 | 0.26  | 0.03 | 0.07 | NM_198620 | RUN domain containing 3B (Rundc3b)                                                   |
| 194 | 0.99 | 5.10E-03 | -0.33 | 0.22  | 0.00 | 0.01 | NM_144801 | RIKEN cDNA 2310076O21 gene (2310076O21Rik)                                           |
| 195 | 0.99 | 5.10E-03 | -0.37 | 0.16  | 0.01 | 0.22 | NM_178789 | RIKEN cDNA B930062P21 gene (B930062P21Rik)                                           |
| 196 | 1.01 | 5.14E-03 | -0.47 | -0.09 | 0.03 | 0.59 | NM_021281 | cathepsin S (Ctss)                                                                   |
| 197 | 1.02 | 5.16E-03 | -0.31 | -0.07 | 0.00 | 0.35 | NM_172881 | hypothetical protein C730031G17 (C730031G17)                                         |
| 198 | 1.08 | 5.47E-03 | -0.44 | 0.58  | 0.06 | 0.11 | NM_008486 | alanyl (membrane) aminopeptidase (Anpep)                                             |
| 199 | 1.08 | 5.45E-03 | -0.30 | -0.25 | 0.03 | 0.05 | NM_010481 | heat shock protein, A (Hspa9a)                                                       |
| 200 | 1.15 | 5.73E-03 | -0.36 | -0.04 | 0.01 | 0.71 | NM_019394 | melanoma inhibitory activity 1 (Mia1)                                                |
| 201 | 1.18 | 5.89E-03 | -0.33 | -0.38 | 0.05 | 0.03 | NM_178715 | transmembrane protein 30B (Tmem30b)                                                  |
| 202 | 1.23 | 6.09E-03 | -0.49 | 0.08  | 0.01 | 0.37 | NM_009049 | regulated endocrine-specific protein 18 (Resp18)                                     |
| 203 | 1.24 | 6.11E-03 | -0.36 | 0.20  | 0.01 | 0.05 | NM_025412 | pyrroline-5-carboxylate reductase-like (Pycl)                                        |
| 204 | 1.26 | 6.16E-03 | -0.42 | 0.25  | 0.01 | 0.02 | XM_127929 | RIKEN cDNA 4933421G18 gene (4933421G18Rik)                                           |
| 205 | 1.27 | 6.22E-03 | -0.30 | -0.11 | 0.00 | 0.13 | NM_134054 | RIKEN cDNA 1110002B05 gene (1110002B05Rik)                                           |
| 206 | 1.29 | 6.26E-03 | -0.33 | 0.37  | 0.00 | 0.00 | NM_008290 | hydroxysteroid (17-beta) dehydrogenase 2 (Hsd17b2)                                   |
| 207 | 1.37 | 6.62E-03 | -0.34 | 0.26  | 0.01 | 0.02 | NM_030024 | RIKEN cDNA E130201N16 gene (E130201N16Rik)                                           |
| 208 | 1.39 | 6.67E-03 | -0.36 | -0.22 | 0.02 | 0.11 | NM_019758 | mitochondrial carrier homolog 2 (C. elegans) (Mtch2)                                 |
| 209 | 1.41 | 6.77E-03 | -0.34 | -0.32 | 0.00 | 0.00 | NM_134020 | RIKEN cDNA 1110014L17 gene (1110014L17Rik)                                           |
| 210 | 1.42 | 6.76E-03 | -0.39 | 0.01  | 0.02 | 0.97 | NM_013813 | erythrocyte protein band 4.1-like 3 (Epb4.1l3)                                       |
| 211 | 1.43 | 6.77E-03 | -0.30 | 0.15  | 0.03 | 0.15 | NM_031256 | pleckstrin homology domain-containing, family A member 3 (Plekha3)                   |
| 212 | 1.44 | 6.78E-03 | -0.30 | -0.25 | 0.00 | 0.00 | NM_027194 | RIKEN cDNA 2410018G23 gene (2410018G23Rik)                                           |
| 213 | 1.47 | 6.91E-03 | -0.40 | 0.16  | 0.03 | 0.19 | NM_008586 | meprin 1 beta (Mep1b)                                                                |
| 214 | 1.57 | 7.33E-03 | -0.63 | 0.03  | 0.05 | 0.74 | NM_010915 | nerve growth factor, alpha (Ngfa)                                                    |
| 215 | 1.65 | 7.67E-03 | -0.29 | 0.14  | 0.01 | 0.06 | NM_173742 | DNA segment, Chr 11, Brigham & Womens Genetics 0434 expressed (D11Bwg0434e)          |
| 216 | 1.67 | 7.71E-03 | -0.39 | 0.03  | 0.02 | 0.75 | NM_175511 | RIKEN cDNA A130092J06 gene (A130092J06Rik)                                           |
| 217 | 1.73 | 7.95E-03 | -0.35 | -0.17 | 0.09 | 0.27 | NM_134021 | expressed sequence AI415282 (AI415282)                                               |
| 218 | 1.84 | 8.42E-03 | -0.31 | 0.13  | 0.00 | 0.03 | NM_153417 | transient receptor potential cation channel, subfamily M, member 6 (Trpm6)           |

|     |      |          |       |       |      |      |           |                                                                                                     |
|-----|------|----------|-------|-------|------|------|-----------|-----------------------------------------------------------------------------------------------------|
| 219 | 1.85 | 8.44E-03 | -0.30 | 0.21  | 0.03 | 0.02 | NM_175274 | tweety homolog 3 ( <i>Drosophila</i> ) (Ttyh3)                                                      |
| 220 | 1.85 | 8.42E-03 | -0.32 | 0.19  | 0.00 | 0.13 | XM_129987 |                                                                                                     |
| 221 | 1.85 | 8.39E-03 | -0.36 | 0.10  | 0.02 | 0.33 | NM_030004 | crystallin, lamda 1 (Cryl1)                                                                         |
| 222 | 1.86 | 8.40E-03 | -0.35 | 0.30  | 0.03 | 0.01 | NM_028132 | phosphoglucomutase 2 (Pgm2)                                                                         |
| 223 | 1.95 | 8.72E-03 | -0.72 | 0.34  | 0.06 | 0.39 | XM_128172 | RIKEN cDNA 2010001J22 gene (2010001J22Rik)                                                          |
| 224 | 1.97 | 8.78E-03 | -0.31 | 0.05  | 0.01 | 0.48 | NM_023608 | glycerophosphodiester phosphodiesterase domain containing 2 (Gdpd2)                                 |
| 225 | 2    | 8.89E-03 | -0.33 | 0.32  | 0.01 | 0.02 | NM_015801 | neuropathy target esterase (Nte)                                                                    |
| 226 | 2.02 | 8.95E-03 | -0.40 | 0.21  | 0.02 | 0.21 | NM_007405 | adenylate cyclase 6 (Adcy6)                                                                         |
| 227 | 2.07 | 9.10E-03 | -0.58 | -0.15 | 0.01 | 0.41 | NM_007382 | acetyl-Coenzyme A dehydrogenase, medium chain (Acadm)                                               |
| 228 | 2.08 | 9.12E-03 | -0.35 | 0.09  | 0.00 | 0.47 | NM_021304 | abhydrolase domain containing 1 (Abhd1)                                                             |
| 229 | 2.09 | 9.15E-03 | -0.34 | -0.17 | 0.05 | 0.34 | NM_010638 | basic transcription element binding protein 1 (Bteb1)                                               |
| 230 | 2.16 | 9.40E-03 | -0.52 | 0.84  | 0.03 | 0.01 | NM_130864 | acetyl-Coenzyme A acyltransferase 1A (Acaa1a)                                                       |
| 231 | 2.2  | 9.54E-03 | -0.30 | 0.19  | 0.14 | 0.22 | XM_128511 | RIKEN cDNA 0610011F06 gene (0610011F06Rik)                                                          |
| 232 | 2.23 | 9.62E-03 | -0.47 | -0.04 | 0.01 | 0.88 | NM_022433 | sirtuin 3 (silent mating type information regulation 2, homolog) 3 ( <i>S. cerevisiae</i> ) (Sirt3) |
| 233 | 2.28 | 9.80E-03 | -0.29 | -0.09 | 0.02 | 0.32 | NM_019769 | RIKEN cDNA 1500003O03 gene (1500003O03Rik)                                                          |
| 234 | 2.31 | 9.89E-03 | -0.45 | -0.06 | 0.02 | 0.57 | NM_009801 | carbonic anhydrase 2 (Car2)                                                                         |
| 235 | 2.34 | 9.95E-03 | -0.35 | 0.26  | 0.01 | 0.01 | NM_145743 | lactation elevated 1 (Lace1)                                                                        |
| 236 | 2.36 | 1.00E-02 | -0.39 | 0.36  | 0.02 | 0.01 | NM_026313 | RIKEN cDNA 3300001P08 gene (3300001P08Rik)                                                          |
| 237 | 2.41 | 1.02E-02 | -0.45 | -0.25 | 0.05 | 0.14 | NM_134021 | expressed sequence AI415282 (AI415282)                                                              |
| 238 | 2.49 | 1.05E-02 | -0.32 | -0.16 | 0.01 | 0.12 | XM_127323 | RIKEN cDNA 1810073P09 gene (1810073P09Rik)                                                          |
| 239 | 2.52 | 1.05E-02 | -0.46 | 0.19  | 0.02 | 0.11 | XM_134937 | RIKEN cDNA 0610010I15 gene (0610010I15Rik)                                                          |
| 240 | 2.56 | 1.06E-02 | -0.40 | 0.54  | 0.01 | 0.00 | NM_026633 | RIKEN cDNA 9530058B02 gene (9530058B02Rik)                                                          |
| 241 | 2.58 | 1.07E-02 | -0.78 | -0.86 | 0.01 | 0.00 | XM_147230 | eukaryotic translation initiation factor 4A2 (Eif4a2)                                               |
| 242 | 2.76 | 1.14E-02 | -0.43 | 0.43  | 0.01 | 0.00 | NM_011396 | solute carrier family 22 (organic cation transporter), member 5 (Slc22a5)                           |
| 243 | 2.81 | 1.15E-02 | -0.64 | 0.23  | 0.01 | 0.29 | NM_053109 | osteoclast inhibitory lectin (Ocil)                                                                 |
| 244 | 2.86 | 1.17E-02 | -0.58 | 0.26  | 0.03 | 0.16 | NM_177470 | acetyl-Coenzyme A acyltransferase 2 (mitochondrial 3-oxoacyl-Coenzyme A thiolase) (Acaa2)           |
| 245 | 2.89 | 1.18E-02 | -0.33 | 0.29  | 0.06 | 0.09 | NM_010046 | diacylglycerol O-acyltransferase 1 (Dgat1)                                                          |
| 246 | 2.93 | 1.19E-02 | -0.28 | 0.37  | 0.07 | 0.01 | NM_009768 | basigin (Bsg)                                                                                       |
| 247 | 3.01 | 1.22E-02 | -0.29 | 0.29  | 0.00 | 0.02 | NM_025717 | RIKEN cDNA 4921506I22 gene (4921506I22Rik)                                                          |
| 248 | 3.03 | 1.22E-02 | -0.53 | 0.13  | 0.01 | 0.42 | NM_175105 | aquaporin 11 (Aqp11)                                                                                |
| 249 | 3.09 | 1.24E-02 | -0.28 | -0.03 | 0.00 | 0.63 | NM_146139 | vav 3 oncogene (Vav3)                                                                               |
| 250 | 3.13 | 1.25E-02 | -0.29 | 0.25  | 0.00 | 0.00 | NM_026530 | RIKEN cDNA E130307M08 gene (E130307M08Rik)                                                          |
| 251 | 3.17 | 1.26E-02 | -0.48 | 0.43  | 0.01 | 0.02 | NM_016892 | copper chaperone for superoxide dismutase (Ccs)                                                     |
| 252 | 3.18 | 1.26E-02 | -0.41 | -0.06 | 0.02 | 0.76 | NM_009856 | CD83 antigen (Cd83)                                                                                 |
| 253 | 3.19 | 1.26E-02 | -0.31 | 0.00  | 0.01 | 0.87 | XM_194020 | activin A receptor, type IC (Acvr1c)                                                                |
| 254 | 3.2  | 1.26E-02 | -0.28 | 0.31  | 0.01 | 0.00 | NM_016928 | toll-like receptor 5 (Tlr5)                                                                         |
| 255 | 3.28 | 1.29E-02 | -0.33 | -0.05 | 0.00 | 0.35 | NM_181066 | EST AA881470 (AA881470)                                                                             |
| 256 | 3.38 | 1.32E-02 | -0.32 | -0.15 | 0.01 | 0.07 | NM_010301 | guanine nucleotide binding protein, alpha 11 (Gna11)                                                |
| 257 | 3.5  | 1.36E-02 | -0.39 | -0.51 | 0.11 | 0.03 | NM_145474 | cytochrome P450, family 2, subfamily d, polypeptide 34 (Cyp2d34)                                    |
| 258 | 3.53 | 1.37E-02 | -0.39 | 0.05  | 0.08 | 0.68 | NM_008457 | kallikrein 8 (Klk8)                                                                                 |
| 259 | 3.54 | 1.37E-02 | -0.53 | 0.21  | 0.02 | 0.41 | NM_010459 | homeo box B4 (Hoxb4)                                                                                |
| 260 | 3.56 | 1.37E-02 | -0.31 | -0.10 | 0.00 | 0.10 | NM_177206 | RIKEN cDNA 9230101K24 gene (9230101K24Rik)                                                          |
| 261 | 3.61 | 1.38E-02 | -0.52 | 1.08  | 0.02 | 0.02 | NM_023137 | ubiquitin D (Ubd)                                                                                   |
| 262 | 3.63 | 1.39E-02 | -0.33 | -0.16 | 0.01 | 0.23 | NM_146133 | RIKEN cDNA 2010204I15 gene (2010204I15Rik)                                                          |
| 263 | 3.65 | 1.39E-02 | -0.32 | 0.06  | 0.00 | 0.34 | NM_177874 | hypothetical protein F830003B07 (F830003B07)                                                        |
| 264 | 3.75 | 1.42E-02 | -0.46 | -0.14 | 0.04 | 0.60 | NM_130882 | cytochrome P450, family 4, subfamily f, polypeptide 13 (Cyp4f13)                                    |

|     |      |          |       |       |      |      |           |                                                                                             |
|-----|------|----------|-------|-------|------|------|-----------|---------------------------------------------------------------------------------------------|
| 265 | 3.79 | 1.43E-02 | -0.28 | -0.01 | 0.01 | 0.93 | NM_013889 | zinc finger protein 292 (Zfp292)                                                            |
| 266 | 3.79 | 1.42E-02 | -0.39 | 0.30  | 0.07 | 0.10 | NM_134147 | RIKEN cDNA D930010J01 gene (D930010J01Rik)                                                  |
| 267 | 3.82 | 1.43E-02 | -0.31 | -0.21 | 0.00 | 0.06 | NM_008695 | nidogen 2 (Nid2)                                                                            |
| 268 | 3.87 | 1.44E-02 | -0.32 | 0.30  | 0.01 | 0.04 | NM_009945 | cytochrome c oxidase, subunit VIIa 2 (Cox7a2)                                               |
| 269 | 3.99 | 1.48E-02 | -0.47 | -0.52 | 0.02 | 0.00 | XM_357113 |                                                                                             |
| 270 | 3.99 | 1.48E-02 | -0.29 | 0.21  | 0.01 | 0.07 | NM_011354 | small EDRK-rich factor 2 (Serf2)                                                            |
| 271 | 4.11 | 1.52E-02 | -0.42 | 0.30  | 0.08 | 0.14 | XM_129721 |                                                                                             |
| 272 | 4.11 | 1.51E-02 | -0.26 | 0.26  | 0.04 | 0.07 | NM_026680 | RIKEN cDNA 0610012C01 gene (0610012C01Rik)                                                  |
| 273 | 4.17 | 1.53E-02 | -0.53 | -0.16 | 0.02 | 0.30 | NM_172607 | RIKEN cDNA 9130210N20 gene (9130210N20Rik)                                                  |
| 274 | 4.22 | 1.53E-02 | -0.27 | -0.20 | 0.01 | 0.03 | XM_149387 |                                                                                             |
| 275 | 4.22 | 1.53E-02 | -0.38 | -0.08 | 0.00 | 0.42 | NM_172607 | RIKEN cDNA 9130210N20 gene (9130210N20Rik)                                                  |
| 276 | 4.22 | 1.53E-02 | -0.29 | 0.25  | 0.01 | 0.02 | NM_145134 | SPRY domain-containing SOCS box 4 (Ssb4)                                                    |
| 277 | 4.23 | 1.53E-02 | -0.48 | 0.35  | 0.01 | 0.01 | NM_030706 | tripartite motif protein 2 (Trim2)                                                          |
| 278 | 4.33 | 1.56E-02 | -0.36 | 0.01  | 0.01 | 0.88 | NM_130884 | isocitrate dehydrogenase 3 (NAD+) beta (Idh3b)                                              |
| 279 | 4.44 | 1.59E-02 | -0.37 | -0.23 | 0.02 | 0.13 | NM_013935 | protein tyrosine phosphatase-like (proline instead of catalytic arginine), member a (Ptpla) |
| 280 | 4.6  | 1.64E-02 | -0.31 | -0.07 | 0.03 | 0.30 | NM_026436 | RIKEN cDNA 1810054O13 gene (1810054O13Rik)                                                  |
| 281 | 4.72 | 1.68E-02 | -0.32 | 0.32  | 0.02 | 0.00 | NM_009849 | ectonucleoside triphosphate diphosphohydrolase 2 (Entpd2)                                   |
| 282 | 4.74 | 1.68E-02 | -0.27 | 0.36  | 0.00 | 0.00 | NM_019730 | expressed in non-metastatic cells 3 (Nme3)                                                  |
| 283 | 4.76 | 1.68E-02 | -0.43 | 0.13  | 0.01 | 0.27 | XM_181343 |                                                                                             |
| 284 | 4.81 | 1.69E-02 | -0.34 | 0.07  | 0.02 | 0.48 | NM_139144 | O-linked N-acetylglucosamine (GlcNAc) transferase(Ogt)                                      |
| 285 | 4.94 | 1.73E-02 | -0.72 | -0.07 | 0.01 | 0.79 | NM_175316 | solute carrier organic anion transporter family, member 2b1 (Slco2b1)                       |
| 286 | 5.12 | 1.79E-02 | -0.35 | 0.08  | 0.01 | 0.31 | NM_008199 | histocompatibility 2, blastocyst (H2-BI)                                                    |
| 287 | 5.14 | 1.79E-02 | -0.42 | 0.24  | 0.00 | 0.11 | NM_008129 | glutamate-cysteine ligase , modifier subunit (Gclm)                                         |
| 288 | 5.24 | 1.82E-02 | -0.44 | 0.07  | 0.04 | 0.63 | NM_146083 | splicing factor, arginine/serine-rich 7 (Sfrs7)                                             |
| 289 | 5.4  | 1.87E-02 | -0.27 | 0.26  | 0.00 | 0.00 | NM_008688 | nuclear factor I/C (Nfic)                                                                   |
| 290 | 5.41 | 1.87E-02 | -0.39 | -0.62 | 0.03 | 0.00 | NM_134079 | adenosine kinase (Adk)                                                                      |
| 291 | 5.42 | 1.86E-02 | -0.31 | 0.11  | 0.02 | 0.45 | NM_019718 | ADP-ribosylation factor-like 3 (Arl3)                                                       |
| 292 | 5.44 | 1.86E-02 | -0.32 | 0.19  | 0.01 | 0.00 | NM_025697 | RIKEN cDNA 6330409N04 gene (6330409N04Rik)                                                  |
| 293 | 5.46 | 1.86E-02 | -0.31 | 0.04  | 0.00 | 0.71 | NM_177684 | zinc finger protein 637 (Zfp637)                                                            |
| 294 | 5.49 | 1.87E-02 | -0.87 | -0.03 | 0.01 | 0.95 | NM_008278 | hydroxyprostaglandin dehydrogenase 15 (NAD) (Hpgd)                                          |
| 295 | 5.62 | 1.91E-02 | -0.41 | 0.37  | 0.02 | 0.02 | NM_026159 | RIKEN cDNA 0610039N19 gene (0610039N19Rik)                                                  |
| 296 | 5.76 | 1.95E-02 | -0.27 | 0.11  | 0.01 | 0.14 | NM_023041 | peroxisome biogenesis factor 19 (Pex19)                                                     |
| 297 | 5.91 | 1.99E-02 | -0.46 | -0.24 | 0.01 | 0.10 | NM_007860 | deiodinase, iodothyronine, type I (Dio1)                                                    |
| 298 | 5.96 | 2.00E-02 | -0.83 | -0.07 | 0.07 | 0.97 | NM_025470 | RIKEN cDNA 1810030J14 gene (1810030J14Rik)                                                  |
| 299 | 6.08 | 2.03E-02 | -0.32 | 0.05  | 0.01 | 0.56 | NM_009478 | uroporphyrinogen decarboxylase (Urod)                                                       |
| 300 | 6.3  | 2.10E-02 | -0.25 | 0.10  | 0.02 | 0.10 | NM_010232 | flavin containing monooxygenase 5 (Fmo5)                                                    |
| 301 | 6.4  | 2.13E-02 | -0.30 | 0.15  | 0.00 | 0.14 | NM_133182 | heterogeneous nuclear ribonucleoprotein methyltransferase-like 1 (S. cerevisiae) (Hrmt11)   |
| 302 | 6.41 | 2.12E-02 | -0.27 | 0.30  | 0.01 | 0.01 | NM_025457 | RIKEN cDNA 1810008A14 gene (1810008A14Rik)                                                  |
| 303 | 6.45 | 2.13E-02 | -0.28 | -0.22 | 0.00 | 0.00 | XM_131162 | sorting nexin 7 (Snx7)                                                                      |
| 304 | 6.63 | 2.18E-02 | -0.30 | -0.03 | 0.01 | 0.75 | NM_011464 | serine protease inhibitor, Kunitz type 2 (Spint2)                                           |
| 305 | 6.72 | 2.20E-02 | -0.36 | 0.17  | 0.01 | 0.14 | NM_172656 | amyotrophic lateral sclerosis 2 (juvenile) chromosome region, candidate 2 homolog (Als2cr2) |
| 306 | 6.87 | 2.24E-02 | -0.27 | 0.07  | 0.02 | 0.14 | NM_023065 | interferon gamma inducible protein 30 (Ifi30)                                               |
| 307 | 6.93 | 2.26E-02 | -0.28 | 0.53  | 0.15 | 0.01 | NM_009437 | thiosulfate sulfurtransferase, mitochondrial (Tst)                                          |
| 308 | 7.3  | 2.37E-02 | -0.59 | 0.60  | 0.04 | 0.00 | XM_129243 | cytochrome P450, family 2, subfamily c, polypeptide 65 (Cyp2c65)                            |
| 309 | 7.3  | 2.36E-02 | -0.24 | 0.34  | 0.01 | 0.44 | NM_010387 | histocompatibility 2, class II, locus Mb1 (H2-DMb1)                                         |
| 310 | 7.78 | 2.51E-02 | -0.46 | 0.42  | 0.05 | 0.02 | NM_009207 | solute carrier family 4 (anion exchanger), member 2 (Slc4a2)                                |

|     |       |          |       |       |      |      |           |                                                                                                     |
|-----|-------|----------|-------|-------|------|------|-----------|-----------------------------------------------------------------------------------------------------|
| 311 | 7.9   | 2.54E-02 | -0.29 | 0.23  | 0.04 | 0.14 | NM_025560 | RIKEN cDNA 1810049H13 gene (1810049H13Rik)                                                          |
| 312 | 7.91  | 2.54E-02 | -0.52 | 0.02  | 0.01 | 0.87 | NM_198037 | RIKEN cDNA B430218L07 gene (B430218L07Rik)                                                          |
| 313 | 7.92  | 2.53E-02 | -0.29 | 0.25  | 0.03 | 0.05 | NM_025661 | ORM1-like 3 ( <i>S. cerevisiae</i> ) (Ormdl3)                                                       |
| 314 | 8.14  | 2.59E-02 | -0.70 | 0.39  | 0.02 | 0.18 | NM_008289 | hydroxysteroid 11-beta dehydrogenase 2 (Hsd11b2)                                                    |
| 315 | 8.16  | 2.59E-02 | -0.27 | -0.07 | 0.00 | 0.16 | NM_145125 | WD repeat domain 9 (Wdr9)                                                                           |
| 316 | 8.19  | 2.59E-02 | -0.30 | 0.18  | 0.00 | 0.00 | NM_024442 | cytochrome P450, family 4, subfamily f, polypeptide 16 (Cyp4f16)                                    |
| 317 | 8.63  | 2.72E-02 | -0.27 | 0.09  | 0.00 | 0.17 | NM_024464 | RIKEN cDNA 2010319C14 gene (2010319C14Rik)                                                          |
| 318 | 8.67  | 2.73E-02 | -0.24 | 0.07  | 0.10 | 0.56 | NM_019543 | Down syndrome critical region homolog 5 (human) (Dscr5)                                             |
| 319 | 8.68  | 2.72E-02 | -0.38 | 0.69  | 0.03 | 0.00 | NM_026633 | RIKEN cDNA 9530058B02 gene (9530058B02Rik)                                                          |
| 320 | 8.75  | 2.73E-02 | -0.29 | 0.32  | 0.07 | 0.03 | NM_013677 | surfeit gene 1 (Surf1)                                                                              |
| 321 | 8.77  | 2.73E-02 | -0.49 | 0.08  | 0.02 | 0.62 | NM_026159 | RIKEN cDNA 0610039N19 gene (0610039N19Rik)                                                          |
| 322 | 8.8   | 2.73E-02 | -0.28 | 0.52  | 0.12 | 0.00 | NM_007754 | carboxypeptidase D (Cpd)                                                                            |
| 323 | 8.89  | 2.75E-02 | -0.34 | -0.11 | 0.03 | 0.36 | NM_146141 | RIKEN cDNA 1110013G13 gene (1110013G13Rik)                                                          |
| 324 | 8.9   | 2.75E-02 | -0.25 | 0.04  | 0.00 | 0.29 | NM_145523 | granulysin (Gca)                                                                                    |
| 325 | 9.27  | 2.85E-02 | -0.27 | 0.24  | 0.02 | 0.04 | NM_024192 | CUE domain containing 2 (Cuedc2)                                                                    |
| 326 | 9.36  | 2.87E-02 | -0.40 | -0.09 | 0.06 | 0.56 | XM_125538 | sestrin 1 (Sesn1)                                                                                   |
| 327 | 9.68  | 2.96E-02 | -0.35 | 0.36  | 0.01 | 0.01 | XM_204313 | RIKEN cDNA 2300009A05 gene (2300009A05Rik)                                                          |
| 328 | 9.73  | 2.97E-02 | -0.39 | 0.23  | 0.06 | 0.12 | NM_024186 | single-stranded DNA binding protein 2 (Ssbp2)                                                       |
| 329 | 9.78  | 2.97E-02 | -0.26 | 0.61  | 0.01 | 0.00 | NM_198415 | creatine kinase, mitochondrial 2 (Ckmt2)                                                            |
| 330 | 9.81  | 2.97E-02 | -0.23 | 0.18  | 0.02 | 0.02 | NM_010047 | DiGeorge syndrome critical region gene 6 (Dgcr6)                                                    |
| 331 | 10.06 | 3.04E-02 | -0.29 | -0.44 | 0.00 | 0.00 | NM_011682 | utrophin (Utrn)                                                                                     |
| 332 | 10.09 | 3.04E-02 | -0.47 | 0.23  | 0.01 | 0.08 | XM_131643 |                                                                                                     |
| 333 | 10.11 | 3.03E-02 | -0.37 | -0.03 | 0.02 | 0.65 | NM_007693 | chromogranin A (Chga)                                                                               |
| 334 | 10.36 | 3.10E-02 | -0.25 | 0.22  | 0.00 | 0.01 | NM_023374 | succinate dehydrogenase complex, subunit B, iron sulfur (Ip) (Sdhb)                                 |
| 335 | 10.54 | 3.15E-02 | -0.73 | -0.16 | 0.04 | 0.80 | NM_029638 | amiloride binding protein 1 (amine oxidase, copper-containing) (Abp1)                               |
| 336 | 10.6  | 3.15E-02 | -0.31 | 0.02  | 0.00 | 0.77 | NM_022433 | sirtuin 3 (silent mating type information regulation 2, homolog) 3 ( <i>S. cerevisiae</i> ) (Sirt3) |
| 337 | 10.62 | 3.15E-02 | -0.42 | 0.41  | 0.05 | 0.05 | NM_145428 | cDNA sequence BC003479 (BC003479)                                                                   |
| 338 | 10.64 | 3.15E-02 | -0.32 | 0.07  | 0.04 | 0.61 | NM_025455 | RIKEN cDNA 1810010N17 gene (1810010N17Rik)                                                          |
| 339 | 10.65 | 3.14E-02 | -0.32 | 0.20  | 0.00 | 0.05 | NM_146141 | RIKEN cDNA 1110013G13 gene (1110013G13Rik)                                                          |
| 340 | 10.7  | 3.15E-02 | -0.26 | 0.26  | 0.08 | 0.08 | NM_013889 | zinc finger protein 292 (Zfp292)                                                                    |
| 341 | 10.75 | 3.15E-02 | -0.28 | 0.03  | 0.00 | 0.84 | NM_025835 | propionyl Coenzyme A carboxylase, beta polypeptide (Pccb)                                           |
| 342 | 11.02 | 3.22E-02 | -0.26 | -0.08 | 0.00 | 0.31 | NM_153574 | RIKEN cDNA D430015B01 gene (D430015B01Rik)                                                          |
| 343 | 11.11 | 3.24E-02 | -0.26 | 0.17  | 0.05 | 0.20 | NM_008813 | ectonucleotide pyrophosphatase/phosphodiesterase 1 (Enpp1)                                          |
| 344 | 11.18 | 3.25E-02 | -0.25 | -0.34 | 0.01 | 0.03 | NM_010422 | hexosaminidase B (Hexb)                                                                             |
| 345 | 11.24 | 3.26E-02 | -0.25 | -0.25 | 0.01 | 0.01 | NM_019396 | cysteine and histidine rich 1 (Cyhr1)                                                               |
| 346 | 11.31 | 3.27E-02 | -0.23 | 0.07  | 0.05 | 0.39 | NM_028048 | RIKEN cDNA 1810012H11 gene (1810012H11Rik)                                                          |
| 347 | 11.35 | 3.27E-02 | -0.27 | 0.04  | 0.00 | 0.57 | NM_009238 | SRY-box containing gene 4 (Sox4)                                                                    |
| 348 | 11.54 | 3.31E-02 | -0.23 | -0.08 | 0.00 | 0.13 | NM_009721 | ATPase, Na <sup>+</sup> /K <sup>+</sup> transporting, beta 1 polypeptide (Atp1b1)                   |
| 349 | 11.82 | 3.39E-02 | -0.27 | -0.15 | 0.03 | 0.09 | NM_008641 | microtubule associated serine/threonine kinase 2 (Mast2)                                            |
| 350 | 11.92 | 3.41E-02 | -0.38 | -0.20 | 0.02 | 0.18 | NM_013758 | adducin 3 (gamma) (Add3)                                                                            |
| 351 | 11.97 | 3.41E-02 | -0.34 | -0.14 | 0.00 | 0.20 | NM_144844 | propionyl-Coenzyme A carboxylase, alpha polypeptide (Pcca)                                          |
| 352 | 12.02 | 3.42E-02 | -0.25 | 0.18  | 0.00 | 0.00 | NM_009239 | trans-acting transcription factor 4 (Sp4)                                                           |
| 353 | 12.06 | 3.42E-02 | -0.28 | -0.23 | 0.00 | 0.02 | NM_008323 | isocitrate dehydrogenase 3 (NAD <sup>+</sup> ), gamma (Idh3g)                                       |
| 354 | 12.42 | 3.51E-02 | -0.23 | 0.21  | 0.01 | 0.02 | NM_026503 | RIKEN cDNA 1110058L19 gene (1110058L19Rik)                                                          |
| 355 | 12.75 | 3.59E-02 | -0.27 | 0.13  | 0.00 | 0.06 | NM_025515 | RIKEN cDNA 2310015N07 gene (2310015N07Rik)                                                          |
| 356 | 12.87 | 3.62E-02 | -0.35 | 0.08  | 0.04 | 0.31 | NM_018824 | solute carrier family 23 (nucleobase transporters), member 2 (Slc23a2)                              |



|     |       |          |       |       |      |      |           |                                                                                                 |
|-----|-------|----------|-------|-------|------|------|-----------|-------------------------------------------------------------------------------------------------|
| 357 | 13.08 | 3.66E-02 | -0.51 | 0.44  | 0.02 | 0.01 | NM_025504 | RIKEN cDNA 2310004L02 gene (2310004L02Rik)                                                      |
| 358 | 13.43 | 3.75E-02 | -0.24 | 0.20  | 0.01 | 0.02 | NM_019443 | NADH dehydrogenase (ubiquinone) 1 alpha subcomplex, 1 (Ndufa1)                                  |
| 359 | 13.47 | 3.75E-02 | -0.67 | -0.12 | 0.03 | 0.35 | NM_008998 | RAB17, member RAS oncogene family (Rab17)                                                       |
| 360 | 13.83 | 3.84E-02 | -0.47 | -0.07 | 0.01 | 0.69 | NM_019521 | growth arrest specific 6 (Gas6)                                                                 |
| 361 | 13.96 | 3.87E-02 | -0.49 | 0.00  | 0.02 | 0.95 | NM_030676 | nuclear receptor subfamily 5, group A, member 2 (Nr5a2)                                         |
| 362 | 14.09 | 3.89E-02 | -0.39 | -0.06 | 0.07 | 0.85 | XM_126043 |                                                                                                 |
| 363 | 14.3  | 3.94E-02 | -0.24 | -0.22 | 0.02 | 0.04 | NM_013917 | pituitary tumor-transforming 1 (Pttg1)                                                          |
| 364 | 14.66 | 4.03E-02 | -0.35 | -0.15 | 0.02 | 0.24 | NM_133710 | CTD (carboxy-terminal domain, RNA polymerase II, polypeptide A) small phosphatase-like (Ctdspl) |
| 365 | 14.8  | 4.05E-02 | -0.53 | 0.13  | 0.02 | 0.34 | NM_011218 | protein tyrosine phosphatase, receptor type, S (Ptpns)                                          |
| 366 | 14.92 | 4.08E-02 | -0.28 | 0.38  | 0.02 | 0.00 | NM_078478 | growth hormone inducible transmembrane protein (Ghitm)                                          |
| 367 | 14.99 | 4.08E-02 | -0.42 | 0.46  | 0.05 | 0.03 | NM_153807 | cDNA sequence BC018371 (BC018371)                                                               |
| 368 | 15.49 | 4.21E-02 | -0.36 | -0.19 | 0.04 | 0.08 | NM_026420 | polyadenylate-binding protein-interacting protein 2 (Paip2)                                     |
| 369 | 15.74 | 4.27E-02 | -0.48 | 0.31  | 0.04 | 0.10 | NM_177470 | acetyl-Coenzyme A acyltransferase 2 (mitochondrial 3-oxoacyl-Coenzyme A thiolase) (Acaa2)       |
| 370 | 15.9  | 4.30E-02 | -0.37 | 0.07  | 0.02 | 0.54 | XM_358776 |                                                                                                 |
| 371 | 15.99 | 4.31E-02 | -0.25 | 0.10  | 0.00 | 0.09 | XM_134800 | RIKEN cDNA 1810046K07 gene (1810046K07Rik)                                                      |
| 372 | 16.07 | 4.32E-02 | -0.29 | 0.17  | 0.02 | 0.04 | NM_175128 | RIKEN cDNA 4930430F08 gene (4930430F08Rik)                                                      |
| 373 | 16.25 | 4.36E-02 | -0.48 | 0.46  | 0.03 | 0.03 | NM_144942 | cysteine sulfinic acid decarboxylase (Csad)                                                     |
| 374 | 16.37 | 4.38E-02 | -0.23 | -0.09 | 0.00 | 0.08 | NM_021431 | nudix (nucleoside diphosphate linked moiety X)-type motif 11 (Nudt11)                           |
| 375 | 16.44 | 4.38E-02 | -0.35 | -0.04 | 0.04 | 0.78 | NM_026229 |                                                                                                 |
| 376 | 16.76 | 4.46E-02 | -0.53 | 0.66  | 0.02 | 0.05 | NM_025654 | RAD52 homolog B (S. cerevisiae) (Rad52b)                                                        |
| 377 | 17.41 | 4.62E-02 | -0.31 | 0.33  | 0.02 | 0.02 | XM_143732 |                                                                                                 |
| 378 | 17.43 | 4.61E-02 | -0.29 | 0.11  | 0.02 | 0.24 | NM_138753 | cardiac lineage protein 1 (Clp1)                                                                |
| 379 | 17.66 | 4.66E-02 | -0.23 | -0.18 | 0.08 | 0.36 | NM_007836 | growth arrest and DNA-damage-inducible 45 alpha (Gadd45a)                                       |
| 380 | 17.71 | 4.66E-02 | -0.37 | -0.09 | 0.08 | 0.70 | NM_015749 | transcobalamin 2 (Tcn2)                                                                         |
| 381 | 17.86 | 4.69E-02 | -0.22 | 0.03  | 0.01 | 0.74 | NM_013909 | F-box and leucine-rich repeat protein 6 (Fbxl6)                                                 |
| 382 | 18.01 | 4.71E-02 | -0.37 | 0.18  | 0.03 | 0.57 | NM_011831 | insulin-like 5 (Insl5)                                                                          |
| 383 | 18.54 | 4.84E-02 | -0.24 | 0.14  | 0.01 | 0.16 | NM_013764 | deoxyguanosine kinase (Dguok)                                                                   |
| 384 | 18.72 | 4.88E-02 | -0.42 | -0.14 | 0.05 | 0.49 | NM_007382 | acetyl-Coenzyme A dehydrogenase, medium chain (Acadm)                                           |
| 385 | 18.94 | 4.92E-02 | -0.24 | -0.14 | 0.01 | 0.09 | XM_135859 | motile sperm domain containing 1 (Mospd1)                                                       |
| 386 | 18.99 | 4.92E-02 | -0.25 | 0.10  | 0.01 | 0.15 | NM_178855 | protease, serine, 7 (enterokinase) (Prss7)                                                      |
| 387 | 19.24 | 4.97E-02 | -0.27 | -0.09 | 0.02 | 0.27 | NM_133695 | cytochrome P450, family 2, subfamily d, polypeptide 13 (Cyp2d13)                                |
| 388 | 19.42 | 5.00E-02 | -0.38 | 0.42  | 0.03 | 0.02 | NM_145962 | pantothenate kinase 3 (Pank3)                                                                   |
