# Supplementary material
Source: PubMed Central journal article supplement (PMC2834836)
Supplement: NIHMS171210-supplement-3.pdf [file NIHMS171210-supplement-3.pdf]

rank = rank based on false discovery analysis

<FP> = false positive rate

FDR = false discovery rate

log2 (ko/wt) = log scale 2 (mean ko std chow / mean wt std chow)

log 2 (koro/ko) = log scale 2 (mean ko ro chow / mean ko std chow)

log 2 ttest ko/wt = unpaired t-test for wt std chow (log2 wt1, log2 wt2, log2 wt3, log2 wt4) versus ko std chow (log2 ko1, log2 ko2, log2 ko3, log2 ko4)

log 2 ttest koro/ko = unpaired t-test for ko ro chow (log2 koro1, log2 koro2, log2 koro3, log2 koro4) versus ko std chow (log2 ko1, log2 ko2, log2 ko3, log2 ko4)

Acc = GenBank Accession number

Description = GenBank description

| rank | <FP>     | FDR      | log2 (ko/wt) | log2 (koro/ko) | log2 ttest ko/wt | log2 ttest koro/k | Acc       | Description                                                                                  |
|------|----------|----------|--------------|----------------|------------------|-------------------|-----------|----------------------------------------------------------------------------------------------|
| 1    | 1.30E-06 | 1.30E-06 | 1.67         | -0.39          | 0.09             | 0.82              | NM_011036 | pancreatitis-associated protein (Pap)                                                        |
| 4    | 1.37E-05 | 3.43E-06 | 2.34         | -0.02          | 0.01             | 0.97              | NM_025777 | RIKEN cDNA 9030623N16 gene (9030623N16Rik)                                                   |
| 3    | 1.14E-05 | 3.78E-06 | 1.31         | -0.19          | 0.00             | 0.44              | NM_022879 | myosin, light polypeptide 7, regulatory (Myl7)                                               |
| 2    | 7.95E-06 | 3.97E-06 | 2.01         | -0.85          | 0.05             | 0.46              | NM_011260 | regenerating islet-derived 3 gamma (Reg3g)                                                   |
| 5    | 2.05E-05 | 4.09E-06 | 1.61         | -0.92          | 0.12             | 0.40              | NM_011036 | pancreatitis-associated protein (Pap)                                                        |
| 6    | 2.51E-05 | 4.19E-06 | 1.12         | 0.20           | 0.00             | 0.16              | NM_007599 | capping protein (actin filament), gelsolin-like (Capg)                                       |
| 7    | 2.94E-05 | 4.20E-06 | 1.27         | 0.41           | 0.01             | 0.38              | NM_009903 | claudin 4 (Cldn4)                                                                            |
| 8    | 5.69E-05 | 7.11E-06 | 1.99         | -0.04          | 0.02             | 0.83              | XM_131683 | RIKEN cDNA 1700018O18 gene (1700018O18Rik)                                                   |
| 9    | 7.03E-05 | 7.81E-06 | 1.00         | 0.42           | 0.00             | 0.20              | NM_025929 | RIKEN cDNA 2010109I03 gene (2010109I03Rik)                                                   |
| 10   | 9.74E-05 | 9.74E-06 | 1.16         | -0.27          | 0.00             | 0.34              | NM_008102 | GTP cyclohydrolase 1 (Gch1)                                                                  |
| 11   | 1.46E-04 | 1.33E-05 | 1.03         | 0.16           | 0.00             | 0.48              | NM_133662 | immediate early response 3 (Ier3)                                                            |
| 12   | 1.62E-04 | 1.35E-05 | 0.95         | -0.04          | 0.00             | 0.82              | NM_030612 | nuclear factor of kappa light polypeptide gene enhancer in B-cells inhibitor, zeta (Nfkbiz), |
| 14   | 2.13E-04 | 1.52E-05 | 2.00         | -0.41          | 0.01             | 0.71              | XM_110239 | tripartite motif protein 15 (Trim15)                                                         |
| 13   | 2.02E-04 | 1.55E-05 | 3.43         | -2.21          | 0.05             | 0.21              | NM_029796 | leucine-rich alpha-2-glycoprotein 1 (Lrg1)                                                   |
| 15   | 3.39E-04 | 2.26E-05 | 1.08         | -0.29          | 0.06             | 0.61              | NM_007913 | early growth response 1 (Egr1)                                                               |
| 16   | 3.99E-04 | 2.49E-05 | 0.89         | 0.04           | 0.01             | 0.87              | NM_009405 | troponin I, skeletal, fast 2 (Tnni2)                                                         |
| 17   | 4.67E-04 | 2.75E-05 | 1.09         | 0.47           | 0.01             | 0.20              | NM_007969 | extracellular proteinase inhibitor (Expi)                                                    |
| 18   | 5.27E-04 | 2.93E-05 | 0.83         | -0.16          | 0.00             | 0.48              | NM_013642 | dual specificity phosphatase 1 (Dusp1)                                                       |
| 19   | 5.74E-04 | 3.02E-05 | 0.86         | -0.38          | 0.00             | 0.12              | NM_008489 | lipopolysaccharide binding protein (Lbp)                                                     |
| 21   | 8.29E-04 | 3.95E-05 | 0.80         | 0.18           | 0.00             | 0.29              | NM_018802 | synaptotagmin 8 (Syt8)                                                                       |
| 20   | 8.19E-04 | 4.10E-05 | 0.91         | -0.17          | 0.00             | 0.40              | NM_010415 | diphtheria toxin receptor (Dtr)                                                              |
| 22   | 9.35E-04 | 4.25E-05 | 0.95         | -0.27          | 0.01             | 0.29              | NM_146094 | fatty acid desaturase 1 (Fads1)                                                              |
| 25   | 1.16E-03 | 4.64E-05 | 1.10         | 0.62           | 0.00             | 0.03              | NM_009344 | pleckstrin homology-like domain, family A, member 1 (Phlda1)                                 |
| 24   | 1.14E-03 | 4.73E-05 | 1.08         | 0.15           | 0.03             | 0.73              | NM_183274 | RIKEN cDNA 0610041G09 gene (0610041G09Rik)                                                   |
| 23   | 1.11E-03 | 4.81E-05 | 1.18         | -0.41          | 0.01             | 0.27              | NM_177733 | E2F transcription factor 2 (E2f2)                                                            |
| 26   | 1.26E-03 | 4.84E-05 | 0.83         | 0.31           | 0.00             | 0.08              | NM_145533 | spermine oxidase (Smox)                                                                      |
| 27   | 1.59E-03 | 5.88E-05 | 1.12         | -0.86          | 0.11             | 0.22              | NM_008324 | indoleamine-pyrrole 2,3 dioxygenase (Indo)                                                   |
| 28   | 1.93E-03 | 6.89E-05 | 0.73         | 0.01           | 0.00             | 0.90              | NM_021389 | SH3-domain kinase binding protein 1 (Sh3kbp1)                                                |
| 30   | 2.32E-03 | 7.73E-05 | 1.13         | -0.28          | 0.01             | 0.50              | NM_016740 | S100 calcium binding protein A11 (calizzarin) (S100a11)                                      |
| 29   | 2.28E-03 | 7.86E-05 | 0.96         | -0.41          | 0.03             | 0.36              | AK007445  | 10 day old male pancreas cDNA, RIKEN full-length enriched library,                           |
| 32   | 3.26E-03 | 1.02E-04 | 0.82         | 0.18           | 0.01             | 0.74              | NM_007498 | activating transcription factor 3 (Atf3)                                                     |
| 31   | 3.26E-03 | 1.02E-04 | 0.80         | 0.38           | 0.01             | 0.16              | NM_011113 | urokinase plasminogen activator receptor (Plaur)                                             |
| 33   | 3.86E-03 | 1.17E-04 | 0.70         | -0.02          | 0.00             | 0.93              | NM_018754 | stratifin (Sfn)                                                                              |
| 34   | 4.03E-03 | 1.19E-04 | 0.69         | -0.16          | 0.01             | 0.45              | NM_008137 | guanine nucleotide binding protein, alpha 14 (Gna14)                                         |

|    |          |          |      |       |      |      |           |                                                                            |
|----|----------|----------|------|-------|------|------|-----------|----------------------------------------------------------------------------|
| 36 | 4.69E-03 | 1.30E-04 | 0.93 | -0.29 | 0.01 | 0.42 | NM_172976 | 6-phosphofructo-2-kinase/fructose-2,6-biphosphatase 3 (Pfkfb3)             |
| 35 | 4.64E-03 | 1.33E-04 | 0.59 | 0.02  | 0.00 | 0.86 | XM_134274 |                                                                            |
| 37 | 5.37E-03 | 1.45E-04 | 0.62 | -0.29 | 0.00 | 0.07 | NM_019390 | lamin A (Lmna)                                                             |
| 41 | 5.99E-03 | 1.46E-04 | 0.76 | -0.08 | 0.00 | 0.66 | NM_198627 | gene model 691, (NCBI) (Gm691)                                             |
| 40 | 5.85E-03 | 1.46E-04 | 0.60 | 0.20  | 0.00 | 0.13 | NM_145977 | RIKEN cDNA 2210413P12 gene (2210413P12Rik)                                 |
| 39 | 5.83E-03 | 1.49E-04 | 0.61 | -0.13 | 0.00 | 0.33 | NM_010139 | Eph receptor A2 (Epha2)                                                    |
| 38 | 5.77E-03 | 1.52E-04 | 0.59 | -0.31 | 0.00 | 0.05 | NM_145554 | expressed sequence AA691260 (AA691260)                                     |
| 42 | 7.91E-03 | 1.88E-04 | 0.56 | 0.52  | 0.00 | 0.01 | NM_013749 | tumor necrosis factor receptor superfamily, member 12a (Tnfrsf12a)         |
| 43 | 8.12E-03 | 1.89E-04 | 0.55 | -0.19 | 0.00 | 0.17 | NM_153546 | O-acyltransferase (membrane bound) domain containing 1 (Oact1)             |
| 45 | 8.99E-03 | 2.00E-04 | 0.61 | -0.22 | 0.04 | 0.24 | NM_009270 | squalene epoxidase (Sqle)                                                  |
| 44 | 8.86E-03 | 2.01E-04 | 0.61 | 0.03  | 0.00 | 0.85 | NM_033149 | UDP-Gal:betaGlcNAc beta 1,3-galactosyltransferase, polypeptide 5 (B3galt5) |
| 46 | 1.11E-02 | 2.41E-04 | 0.53 | -0.27 | 0.00 | 0.07 | NM_019980 | LPS-induced TN factor (Litaf)                                              |
| 47 | 1.15E-02 | 2.45E-04 | 0.53 | -0.10 | 0.00 | 0.24 | NM_020559 | aminolevulinic acid synthase 1 (Alas1)                                     |
| 48 | 1.34E-02 | 2.79E-04 | 0.66 | -0.29 | 0.00 | 0.17 | NM_133753 | RIKEN cDNA 1300002F13 gene (1300002F13Rik)                                 |
| 51 | 1.57E-02 | 3.09E-04 | 0.62 | -0.23 | 0.02 | 0.18 | NM_013470 | annexin A3 (Anxa3)                                                         |
| 50 | 1.57E-02 | 3.09E-04 | 0.75 | 0.19  | 0.03 | 0.49 | NM_010234 | FBJ osteosarcoma oncogene (Fos)                                            |
| 49 | 1.57E-02 | 3.09E-04 | 0.68 | 0.29  | 0.00 | 0.09 | NM_133685 | RIKEN cDNA 1700093E07 gene (1700093E07Rik)                                 |
| 52 | 1.86E-02 | 3.57E-04 | 0.50 | 0.10  | 0.00 | 0.44 | NM_007918 | eukaryotic translation initiation factor 4E binding protein 1 (Eif4ebp1)   |
| 53 | 2.04E-02 | 3.85E-04 | 0.62 | -0.49 | 0.00 | 0.07 | NM_026862 | RIKEN cDNA 1190003K14 gene (1190003K14Rik)                                 |
| 54 | 2.16E-02 | 4.00E-04 | 0.58 | 0.16  | 0.00 | 0.21 | XM_131262 | RIKEN cDNA 9130020L07 gene (9130020L07Rik)                                 |
| 55 | 2.36E-02 | 4.29E-04 | 0.51 | 0.14  | 0.00 | 0.40 | NM_019390 | lamin A (Lmna)                                                             |
| 56 | 2.48E-02 | 4.43E-04 | 0.49 | -0.12 | 0.00 | 0.17 | NM_007585 | annexin A2 (Anxa2)                                                         |
| 57 | 2.54E-02 | 4.45E-04 | 0.58 | 0.31  | 0.00 | 0.13 | NM_028766 | RIKEN cDNA 1200015A22 gene (1200015A22Rik)                                 |
| 58 | 2.70E-02 | 4.66E-04 | 0.51 | -0.25 | 0.00 | 0.14 | NM_011609 | tumor necrosis factor receptor superfamily, member 1a (Tnfrsf1a)           |
| 61 | 3.07E-02 | 5.03E-04 | 0.54 | 0.04  | 0.00 | 0.71 | NM_023119 | enolase 1, alpha non-neuron (Eno1)                                         |
| 60 | 3.02E-02 | 5.04E-04 | 0.52 | 0.29  | 0.00 | 0.20 | NM_026087 | CEA-related cell adhesion molecule 12 (Ceacam12)                           |
| 62 | 3.13E-02 | 5.05E-04 | 0.49 | -0.04 | 0.00 | 0.44 | NM_026145 | potassium channel tetramerisation domain containing 10 (Kctd10)            |
| 64 | 3.25E-02 | 5.07E-04 | 0.55 | -0.15 | 0.01 | 0.45 | NM_028800 | RIKEN cDNA 2310004N11 gene (2310004N11Rik)                                 |
| 59 | 2.99E-02 | 5.07E-04 | 0.57 | 0.05  | 0.00 | 0.69 | NM_010016 | decay accelerating factor 1 (Daf1)                                         |
| 68 | 3.45E-02 | 5.08E-04 | 0.48 | -0.36 | 0.00 | 0.02 | NM_019762 | plakophilin 3 (Pkp3)                                                       |
| 63 | 3.20E-02 | 5.08E-04 | 0.57 | -0.30 | 0.01 | 0.08 | XM_133915 | RIKEN cDNA 1190003J15 gene (1190003J15Rik)                                 |
| 67 | 3.44E-02 | 5.13E-04 | 0.66 | -0.17 | 0.00 | 0.33 | NM_133838 | EH-domain containing 4 (Ehd4)                                              |
| 66 | 3.40E-02 | 5.15E-04 | 0.45 | 0.06  | 0.00 | 0.50 | NM_178598 | transgelin 2 (Tagln2)                                                      |
| 65 | 3.37E-02 | 5.19E-04 | 0.48 | -0.04 | 0.00 | 0.69 | NM_019924 | ribosomal protein S6 kinase, polypeptide 4 (Rps6ka4)                       |
| 69 | 3.66E-02 | 5.31E-04 | 1.03 | 0.08  | 0.04 | 0.66 | XM_358343 |                                                                            |
| 70 | 3.73E-02 | 5.34E-04 | 0.54 | -0.30 | 0.01 | 0.03 | NM_008850 | phosphatidylinositol transfer protein (Pitpn)                              |
| 71 | 3.95E-02 | 5.56E-04 | 0.47 | -0.22 | 0.00 | 0.09 | NM_008102 | GTP cyclohydrolase 1 (Gch1)                                                |
| 72 | 4.14E-02 | 5.76E-04 | 0.48 | -0.01 | 0.00 | 0.84 | NM_007598 | CAP, adenylate cyclase-associated protein 1 (yeast) (Cap1)                 |
| 75 | 4.46E-02 | 5.94E-04 | 0.49 | -0.07 | 0.00 | 0.56 | NM_173371 | hexose-6-phosphate dehydrogenase (glucose 1-dehydrogenase) (H6pd)          |
| 74 | 4.41E-02 | 5.96E-04 | 0.51 | -0.06 | 0.01 | 0.70 | NM_019390 | lamin A (Lmna)                                                             |
| 73 | 4.37E-02 | 5.99E-04 | 0.82 | 0.39  | 0.00 | 0.05 | NM_008012 | aldo-keto reductase family 1, member B8 (Akr1b8)                           |
| 76 | 4.62E-02 | 6.08E-04 | 0.47 | -0.65 | 0.00 | 0.00 | XM_204283 | RIKEN cDNA 2410003B16 gene (2410003B16Rik)                                 |
| 77 | 4.85E-02 | 6.30E-04 | 0.72 | 0.18  | 0.00 | 0.25 | NM_008615 | malic enzyme, supernatant (Mod1)                                           |
| 78 | 5.11E-02 | 6.55E-04 | 0.47 | -0.15 | 0.00 | 0.05 | NM_013810 | drebrin-like (Dbnl)                                                        |
| 79 | 5.28E-02 | 6.68E-04 | 0.48 | -0.30 | 0.00 | 0.00 | NM_011779 | coronin, actin binding protein 1C (Coro1c)                                 |
| 80 | 5.56E-02 | 6.95E-04 | 0.58 | -0.13 | 0.01 | 0.41 | NM_007477 | ADP-ribosylation factor 2 (Arf2)                                           |

|     |          |          |      |       |      |      |           |                                                                                              |
|-----|----------|----------|------|-------|------|------|-----------|----------------------------------------------------------------------------------------------|
| 81  | 6.08E-02 | 7.50E-04 | 0.68 | 0.00  | 0.01 | 0.94 | NM_026268 | dual specificity phosphatase 6 (Dusp6)                                                       |
| 82  | 6.93E-02 | 8.45E-04 | 0.72 | -0.15 | 0.01 | 0.57 | NM_008474 | keratin complex 2, basic, gene 16 (Krt2-16)                                                  |
| 83  | 7.59E-02 | 9.14E-04 | 0.43 | -0.05 | 0.00 | 0.66 | NM_025859 | ADP-ribosylation factor-like 1 (Arl1)                                                        |
| 84  | 7.72E-02 | 9.19E-04 | 0.42 | 0.09  | 0.00 | 0.32 | NM_027106 | arginine vasopressin-induced 1 (Avpi1)                                                       |
| 85  | 8.16E-02 | 9.60E-04 | 0.45 | -0.22 | 0.00 | 0.06 | NM_021565 | midnolin (Midn)                                                                              |
| 86  | 8.62E-02 | 1.00E-03 | 0.43 | -0.26 | 0.00 | 0.02 | NM_011893 | SH3-domain binding protein 2 (Sh3bp2)                                                        |
| 87  | 8.87E-02 | 1.02E-03 | 0.52 | -0.24 | 0.01 | 0.18 | XM_133034 | ubiquitin-conjugating enzyme E2H (Ube2h)                                                     |
| 89  | 9.14E-02 | 1.03E-03 | 0.65 | -0.02 | 0.00 | 0.92 | NM_009863 | cell division cycle 7 ( <i>S. cerevisiae</i> ) (Cdc7)                                        |
| 88  | 9.14E-02 | 1.03E-03 | 0.46 | -0.01 | 0.00 | 0.94 | NM_008485 | laminin, gamma 2 (Lamc2)                                                                     |
| 90  | 9.34E-02 | 1.04E-03 | 0.47 | -0.20 | 0.09 | 0.31 | NM_145942 | 3-hydroxy-3-methylglutaryl-Coenzyme A synthase 1 (Hmgcs1)                                    |
| 91  | 9.52E-02 | 1.05E-03 | 0.55 | 0.05  | 0.01 | 0.90 | NM_019390 | lamin A (Lmna)                                                                               |
| 92  | 1.00E-01 | 1.09E-03 | 0.48 | -0.17 | 0.03 | 0.42 | NM_010810 | matrix metalloproteinase 7 (Mmp7)                                                            |
| 93  | 0.12     | 1.24E-03 | 0.40 | 0.25  | 0.00 | 0.02 | NM_009775 | benzodiazepine receptor, peripheral (Bzrp)                                                   |
| 94  | 0.12     | 1.29E-03 | 0.58 | -0.24 | 0.02 | 0.29 | NM_026447 | RIKEN cDNA 2810423O19 gene (2810423O19Rik), transcript variant 1                             |
| 95  | 0.13     | 1.33E-03 | 0.46 | -0.28 | 0.00 | 0.02 | NM_033073 | keratin complex 2, basic, gene 7 (Krt2-7)                                                    |
| 96  | 0.13     | 1.33E-03 | 0.43 | -0.24 | 0.01 | 0.09 | NM_025385 | RIKEN cDNA 1110020C13 gene (1110020C13Rik)                                                   |
| 97  | 0.14     | 1.42E-03 | 0.53 | -0.16 | 0.02 | 0.41 | NM_172488 | RIKEN cDNA 9030625A04 gene (9030625A04Rik)                                                   |
| 99  | 0.14     | 1.44E-03 | 0.43 | 0.29  | 0.00 | 0.08 | XM_109756 |                                                                                              |
| 100 | 0.15     | 1.45E-03 | 0.72 | 0.13  | 0.00 | 0.17 | NM_181748 | G protein-coupled receptor 120 (Gpr120)                                                      |
| 98  | 0.14     | 1.45E-03 | 0.70 | 0.15  | 0.01 | 0.39 | NM_007687 | cofilin 1, non-muscle (Cfl1)                                                                 |
| 101 | 0.15     | 1.46E-03 | 0.43 | 0.08  | 0.01 | 0.31 | NM_008851 | phosphatidylinositol transfer protein, membrane-associated 1 (Pitpnm1), transcript variant 1 |
| 102 | 0.17     | 1.64E-03 | 0.52 | -0.51 | 0.01 | 0.01 | NM_021895 | actinin alpha 4 (Actn4)                                                                      |
| 103 | 0.17     | 1.65E-03 | 0.40 | 0.21  | 0.00 | 0.03 | NM_009883 | CCAAT/enhancer binding protein (C/EBP), beta (Cebpb)                                         |
| 104 | 0.17     | 1.66E-03 | 0.39 | -0.07 | 0.00 | 0.30 | NM_008471 | keratin complex 1, acidic, gene 19 (Krt1-19)                                                 |
| 106 | 0.18     | 1.72E-03 | 0.38 | -0.15 | 0.00 | 0.31 | NM_010637 | Kruppel-like factor 4 (gut) (Klf4)                                                           |
| 105 | 0.18     | 1.73E-03 | 0.43 | 0.27  | 0.04 | 0.30 | NM_009416 | tropomyosin 2, beta (Tpm2)                                                                   |
| 107 | 0.19     | 1.78E-03 | 0.42 | -0.20 | 0.01 | 0.06 | NM_198034 | RIKEN cDNA B830021E24 gene (B830021E24Rik)                                                   |
| 108 | 0.2      | 1.88E-03 | 0.44 | -0.24 | 0.00 | 0.01 | NM_145135 | ribonuclease/angiogenin inhibitor 1 (Rnh1)                                                   |
| 111 | 0.22     | 1.97E-03 | 0.39 | -0.05 | 0.00 | 0.55 | NM_013693 | tumor necrosis factor (Tnf)                                                                  |
| 110 | 0.22     | 1.98E-03 | 1.60 | -0.24 | 0.01 | 0.54 | NM_009704 | amphiregulin (Areg)                                                                          |
| 109 | 0.22     | 1.99E-03 | 0.82 | -0.46 | 0.02 | 0.16 | NM_012055 | asparagine synthetase (Asns)                                                                 |
| 112 | 0.23     | 2.08E-03 | 0.41 | -0.11 | 0.01 | 0.51 | NM_011700 | villin-like (Vill), transcript variant 2                                                     |
| 116 | 0.25     | 2.14E-03 | 0.53 | 0.19  | 0.10 | 0.41 | NM_175108 | RIKEN cDNA 2310047C17 gene (2310047C17Rik)                                                   |
| 115 | 0.25     | 2.15E-03 | 0.58 | 0.19  | 0.01 | 0.21 | XM_124389 | chloride intracellular channel 4 (mitochondrial) (Clc4)                                      |
| 113 | 0.24     | 2.16E-03 | 0.45 | -0.42 | 0.00 | 0.01 | NM_007899 | extracellular matrix protein 1 (Ecm1)                                                        |
| 114 | 0.25     | 2.16E-03 | 0.41 | -0.35 | 0.00 | 0.00 | NM_010455 | homeo box A7 (Hoxa7)                                                                         |
| 117 | 0.26     | 2.22E-03 | 0.40 | 0.18  | 0.03 | 0.24 | NM_030236 | F-box only protein 34 (Fbxo34)                                                               |
| 118 | 0.27     | 2.30E-03 | 0.36 | 0.24  | 0.00 | 0.21 | NM_134087 | expressed sequence AA409316 (AA409316)                                                       |
| 123 | 0.28     | 2.31E-03 | 0.45 | -0.37 | 0.03 | 0.04 | NM_011486 | signal transducer and activator of transcription 3 (Stat3)                                   |
| 119 | 0.27     | 2.31E-03 | 0.36 | -0.17 | 0.00 | 0.09 | NM_138653 | B-box and SPRY domain containing (Bspry)                                                     |
| 120 | 0.28     | 2.31E-03 | 0.51 | 0.39  | 0.01 | 0.03 | NM_022435 | trans-acting transcription factor 5 (Sp5)                                                    |
| 121 | 0.28     | 2.32E-03 | 0.37 | -0.25 | 0.00 | 0.01 | NM_011570 | testis derived transcript (Tes)                                                              |
| 122 | 0.28     | 2.33E-03 | 0.38 | 0.02  | 0.00 | 0.69 | XM_110396 | fer-1-like 4 ( <i>C. elegans</i> ) (Fer1l4)                                                  |
| 124 | 0.3      | 2.40E-03 | 0.38 | -0.02 | 0.00 | 0.82 | NM_174851 | interleukin 28 receptor alpha (Il28ra)                                                       |
| 125 | 0.31     | 2.48E-03 | 0.43 | 0.25  | 0.00 | 0.09 | NM_133664 | ladinin (Lad1)                                                                               |
| 128 | 0.32     | 2.49E-03 | 0.45 | 0.02  | 0.00 | 0.83 | NM_181547 | nitric oxide synthase trafficker (LOC329416)                                                 |

|     |      |          |      |       |      |      |           |                                                                                |
|-----|------|----------|------|-------|------|------|-----------|--------------------------------------------------------------------------------|
| 129 | 0.32 | 2.49E-03 | 0.36 | 0.31  | 0.03 | 0.07 | NM_016675 | claudin 2 (Cldn2)                                                              |
| 127 | 0.32 | 2.51E-03 | 0.84 | 0.18  | 0.00 | 0.29 | NM_009794 | calpain 2 (Capn2)                                                              |
| 126 | 0.32 | 2.52E-03 | 0.37 | 0.07  | 0.00 | 0.39 | NM_027008 | potassium channel tetramerisation domain containing 5 (Kctd5)                  |
| 130 | 0.34 | 2.59E-03 | 0.35 | -0.04 | 0.00 | 0.61 | NM_008750 | nucleoredoxin (Nxn)                                                            |
| 131 | 0.35 | 2.67E-03 | 0.45 | -0.09 | 0.10 | 0.48 | NM_134469 | farnesyl diphosphate synthetase (Fdps)                                         |
| 132 | 0.41 | 3.08E-03 | 0.38 | -0.12 | 0.00 | 0.13 | NM_023884 | Ral GEF with PH domain and SH3 binding motif 2 (Ralgps2), transcript variant 2 |
| 133 | 0.41 | 3.12E-03 | 0.42 | 0.26  | 0.02 | 0.08 | NM_175433 | RIKEN cDNA 5430400N05 gene (5430400N05Rik)                                     |
| 135 | 0.43 | 3.19E-03 | 0.50 | 0.09  | 0.05 | 0.59 | XM_283903 |                                                                                |
| 134 | 0.43 | 3.20E-03 | 0.37 | 0.42  | 0.00 | 0.00 | NM_007559 | bone morphogenetic protein 8b (Bmp8b)                                          |
| 136 | 0.44 | 3.22E-03 | 0.45 | 0.01  | 0.04 | 0.94 | NM_009338 | acetyl-Coenzyme A acetyltransferase 2 (Acat2)                                  |
| 138 | 0.45 | 3.28E-03 | 0.46 | 0.05  | 0.04 | 0.94 | NM_010476 | hydroxysteroid (17-beta) dehydrogenase 7 (Hsd17b7)                             |
| 137 | 0.45 | 3.28E-03 | 0.45 | 0.20  | 0.01 | 0.12 | NM_018820 | SERTA domain containing 1 (Sertad1)                                            |
| 139 | 0.46 | 3.31E-03 | 0.41 | 0.31  | 0.00 | 0.12 | NM_172383 | RIKEN cDNA 6330530A05 gene (6330530A05Rik)                                     |
| 140 | 0.47 | 3.37E-03 | 0.50 | -0.28 | 0.01 | 0.15 | NM_008028 | flotillin 2 (Flot2)                                                            |
| 141 | 0.48 | 3.38E-03 | 0.36 | 0.11  | 0.01 | 0.06 | NM_080559 | SH3 domain binding glutamic acid-rich protein-like 3 (Sh3bgrl3)                |
| 142 | 0.49 | 3.46E-03 | 0.36 | 0.58  | 0.03 | 0.01 | NM_007485 | ras homolog gene family, member D (Rhod)                                       |
| 143 | 0.53 | 3.67E-03 | 0.57 | -0.08 | 0.02 | 0.75 | NM_025829 | RIKEN cDNA 1300018P11 gene (1300018P11Rik)                                     |
| 144 | 0.53 | 3.71E-03 | 0.42 | -0.10 | 0.08 | 0.71 | NM_145545 | RIKEN cDNA 9830147J24 gene (9830147J24Rik)                                     |
| 146 | 0.56 | 3.80E-03 | 0.35 | -0.23 | 0.03 | 0.09 | NM_011117 | plectin 1 (Plec1), transcript variant 1                                        |
| 147 | 0.56 | 3.80E-03 | 0.33 | -0.03 | 0.00 | 0.63 | XM_142024 | RIKEN cDNA 5730416F02 gene (5730416F02Rik)                                     |
| 149 | 0.57 | 3.82E-03 | 0.35 | 0.20  | 0.02 | 0.16 | XM_133826 | general transcription factor III C 1 (Gtf3c1)                                  |
| 145 | 0.56 | 3.83E-03 | 0.39 | -0.18 | 0.01 | 0.06 | NM_009457 | ubiquitin-activating enzyme E1, Chr X (Ube1x)                                  |
| 148 | 0.57 | 3.84E-03 | 0.47 | -0.37 | 0.01 | 0.04 | NM_011486 | signal transducer and activator of transcription 3 (Stat3)                     |
| 150 | 0.58 | 3.87E-03 | 0.39 | 0.29  | 0.00 | 0.10 | NM_008928 | mitogen activated protein kinase kinase 3 (Map2k3)                             |
| 151 | 0.6  | 3.96E-03 | 0.34 | 0.11  | 0.00 | 0.01 | NM_178606 | DNA segment, Chr 10, University of California at Los Angeles 1 (D10Ucla1)      |
| 152 | 0.61 | 4.02E-03 | 0.33 | -0.35 | 0.00 | 0.00 | NM_011715 | WD repeat domain 1 (Wdr1)                                                      |
| 153 | 0.62 | 4.03E-03 | 0.95 | -0.37 | 0.05 | 0.44 | NM_020016 | melanoma antigen, family A, 2 (Magea2)                                         |
| 154 | 0.63 | 4.12E-03 | 0.54 | 0.00  | 0.00 | 0.90 | NM_018761 | catenin alpha-like 1 (Catnal1)                                                 |
| 155 | 0.65 | 4.20E-03 | 0.44 | -0.21 | 0.01 | 0.15 | NM_025429 | serine (or cysteine) proteinase inhibitor, clade B, member 1a (Serpinb1a)      |
| 156 | 0.72 | 4.62E-03 | 0.34 | 0.32  | 0.00 | 0.00 | NM_028416 | kringle containing transmembrane protein 2 (Kremen2)                           |
| 157 | 0.75 | 4.78E-03 | 0.58 | -0.32 | 0.06 | 0.29 | NM_008491 | lipocalin 2 (Lcn2)                                                             |
| 158 | 0.79 | 4.99E-03 | 0.58 | -0.09 | 0.01 | 0.52 | NM_010495 | inhibitor of DNA binding 1 (Idb1)                                              |
| 159 | 0.8  | 5.01E-03 | 0.35 | -0.14 | 0.02 | 0.21 | NM_030693 | activating transcription factor 5 (Atf5)                                       |
| 160 | 0.8  | 5.02E-03 | 0.39 | -0.28 | 0.01 | 0.03 | NM_026163 | plakophilin 2 (Pkp2)                                                           |
| 162 | 0.82 | 5.07E-03 | 0.48 | 0.00  | 0.02 | 0.96 | NM_008416 | Jun-B oncogene (Junb)                                                          |
| 161 | 0.82 | 5.09E-03 | 0.37 | -0.31 | 0.01 | 0.03 | NM_025801 | phosphogluconate dehydrogenase (Pgd)                                           |
| 163 | 0.83 | 5.12E-03 | 0.35 | 0.09  | 0.00 | 0.28 | NM_207265 | RIKEN cDNA C230071H18 gene (C230071H18Rik)                                     |
| 164 | 0.85 | 5.16E-03 | 0.33 | -0.06 | 0.00 | 0.51 | NM_145533 | spermine oxidase (Smox)                                                        |
| 165 | 0.86 | 5.19E-03 | 0.34 | -0.10 | 0.00 | 0.16 | NM_207655 | epidermal growth factor receptor (Egfr), transcript variant 1                  |
| 166 | 0.89 | 5.35E-03 | 0.42 | -0.32 | 0.01 | 0.04 | NM_027874 | casein kinase 1, delta (Csnk1d), transcript variant 2                          |
| 167 | 0.91 | 5.46E-03 | 0.57 | 0.18  | 0.03 | 0.59 | NM_173733 | sulfite oxidase (Suox)                                                         |
| 168 | 0.93 | 5.48E-03 | 0.44 | -0.21 | 0.05 | 0.33 | NM_009141 | chemokine (C-X-C motif) ligand 5 (Cxcl5)                                       |
| 169 | 0.93 | 5.48E-03 | 0.50 | -0.12 | 0.01 | 0.48 | XM_355635 |                                                                                |
| 170 | 0.94 | 5.56E-03 | 0.34 | 0.10  | 0.04 | 0.39 | NM_011777 | zyxin (Zyx)                                                                    |
| 171 | 0.95 | 5.57E-03 | 0.43 | 0.12  | 0.00 | 0.67 | NM_008654 | myeloid differentiation primary response gene 116 (Myd116)                     |
| 172 | 1    | 5.84E-03 | 0.38 | -0.19 | 0.02 | 0.13 | NM_023579 | karyopherin (importin) beta 3 (Kpnb3)                                          |

|     |      |          |      |       |      |      |           |                                                                                               |
|-----|------|----------|------|-------|------|------|-----------|-----------------------------------------------------------------------------------------------|
| 173 | 1.05 | 6.08E-03 | 0.35 | -0.17 | 0.01 | 0.13 | XM_355676 | RIKEN cDNA 3830408G10 gene (3830408G10Rik)                                                    |
| 175 | 1.07 | 6.11E-03 | 0.43 | -0.26 | 0.01 | 0.10 | NM_011998 | carbohydrate (chondroitin 6/keratan) sulfotransferase 4 (Chst4)                               |
| 174 | 1.06 | 6.12E-03 | 0.34 | 0.20  | 0.01 | 0.08 | NM_172691 | RIKEN cDNA B230312A22 gene (B230312A22Rik)                                                    |
| 176 | 1.09 | 6.18E-03 | 0.37 | -0.11 | 0.00 | 0.35 | NM_199009 | RIKEN cDNA 4632419K20 gene (4632419K20Rik)                                                    |
| 177 | 1.12 | 6.33E-03 | 0.42 | -0.26 | 0.01 | 0.12 | NM_010557 | interleukin 4 receptor, alpha (Il4ra)                                                         |
| 178 | 1.15 | 6.47E-03 | 0.36 | -0.02 | 0.00 | 0.62 | NM_009384 | T-cell lymphoma invasion and metastasis 1 (Tiam1)                                             |
| 179 | 1.17 | 6.53E-03 | 0.31 | -0.04 | 0.00 | 0.54 | XM_130033 |                                                                                               |
| 180 | 1.19 | 6.62E-03 | 0.33 | 0.00  | 0.04 | 0.96 | NM_207202 | DNA segment, Chr X, Immunex 50, expressed (DXImx50e)                                          |
| 182 | 1.25 | 6.87E-03 | 0.38 | -0.15 | 0.00 | 0.20 | NM_153392 | RIKEN cDNA 4922503N01 gene (4922503N01Rik)                                                    |
| 181 | 1.25 | 6.89E-03 | 0.36 | -0.51 | 0.00 | 0.00 | XM_134274 |                                                                                               |
| 183 | 1.31 | 7.13E-03 | 0.32 | 0.22  | 0.00 | 0.01 | NM_145469 | RIKEN cDNA 9330161F08 gene (9330161F08Rik)                                                    |
| 184 | 1.33 | 7.25E-03 | 0.47 | 0.11  | 0.01 | 0.41 | NM_009812 | caspase 8 (Casp8)                                                                             |
| 185 | 1.36 | 7.37E-03 | 0.51 | -0.48 | 0.00 | 0.00 | NM_028023 | cell division cycle associated 4 (Cdca4)                                                      |
| 186 | 1.4  | 7.54E-03 | 0.44 | -0.07 | 0.01 | 0.52 | NM_011843 | membrane bound C2 domain containing protein (Mbc2)                                            |
| 188 | 1.56 | 8.30E-03 | 1.11 | -0.88 | 0.06 | 0.13 | NM_009311 | tachykinin 1 (Tac1)                                                                           |
| 187 | 1.55 | 8.31E-03 | 0.36 | -0.13 | 0.00 | 0.12 | NM_009395 | tumor necrosis factor, alpha-induced protein 1 (endothelial) (Tnfaip1)                        |
| 189 | 1.58 | 8.35E-03 | 0.99 | -0.06 | 0.03 | 1.00 | NM_018876 | fucosyltransferase 2 (Fut2)                                                                   |
| 190 | 1.64 | 8.63E-03 | 0.40 | -0.37 | 0.00 | 0.01 | NM_028064 | solute carrier family 39 (zinc transporter), member 4 (Slc39a4)                               |
| 191 | 1.67 | 8.76E-03 | 0.34 | -0.01 | 0.01 | 0.92 | NM_145533 | spermine oxidase (Smox)                                                                       |
| 192 | 1.7  | 8.83E-03 | 0.30 | -0.19 | 0.13 | 0.24 | NM_183034 | pleckstrin homology domain containing, family M (with RUN domain) member 1 (Plekhm1)          |
| 193 | 1.77 | 9.19E-03 | 0.31 | -0.29 | 0.00 | 0.04 | NM_172584 | inositol 1,3,4-triphosphate 5/6 kinase (Itpk1)                                                |
| 196 | 1.82 | 9.28E-03 | 0.41 | -0.11 | 0.02 | 0.52 | NM_010877 | neutrophil cytosolic factor 2 (Ncf2)                                                          |
| 195 | 1.81 | 9.29E-03 | 0.32 | 0.39  | 0.06 | 0.04 | NM_007483 | ras homolog gene family, member B (Rheb)                                                      |
| 194 | 1.81 | 9.33E-03 | 0.30 | -0.40 | 0.00 | 0.00 | XM_134274 |                                                                                               |
| 199 | 1.95 | 9.79E-03 | 0.49 | -0.13 | 0.02 | 0.39 | XM_128926 | laminin, alpha 3 (Lama3)                                                                      |
| 198 | 1.95 | 9.83E-03 | 0.30 | 0.26  | 0.00 | 0.02 | NM_181444 | retinoic acid induced 3 (Rai3)                                                                |
| 197 | 1.94 | 9.86E-03 | 0.33 | 0.65  | 0.12 | 0.01 | NM_145209 | 2-5 oligoadenylate synthetase-like 1 (Oas1)                                                   |
| 200 | 1.97 | 9.87E-03 | 0.32 | -0.11 | 0.00 | 0.30 | NM_138752 | expressed sequence AI194308 (AI194308)                                                        |
| 201 | 2.07 | 1.03E-02 | 0.32 | -0.19 | 0.01 | 0.08 | NM_026473 | RIKEN cDNA 2310057H16 gene (2310057H16Rik)                                                    |
| 202 | 2.13 | 1.06E-02 | 0.34 | -0.05 | 0.01 | 0.65 | NM_175833 | carnitine deficiency-associated gene expressed in ventricle 3 (Cdv3)                          |
| 203 | 2.16 | 1.06E-02 | 0.29 | -0.03 | 0.00 | 0.68 | NM_021359 | integrin beta 6 (Itgb6)                                                                       |
| 204 | 2.18 | 1.07E-02 | 0.33 | -0.57 | 0.00 | 0.00 | NM_145402 | cDNA sequence BC003277 (BC003277)                                                             |
| 205 | 2.23 | 1.09E-02 | 0.56 | 0.15  | 0.01 | 0.51 | NM_026416 | S100 calcium binding protein A16 (S100a16)                                                    |
| 206 | 2.24 | 1.09E-02 | 0.43 | 0.27  | 0.00 | 0.03 | NM_007393 | actin, beta, cytoplasmic (Actb)                                                               |
| 207 | 2.26 | 1.09E-02 | 0.50 | -0.23 | 0.03 | 0.30 | NM_175512 | dehydrogenase/reductase (SDR family) member 9 (Dhrs9)                                         |
| 208 | 2.27 | 1.09E-02 | 0.41 | -0.13 | 0.02 | 0.46 | NM_008176 | chemokine (C-X-C motif) ligand 1 (Cxcl1)                                                      |
| 209 | 2.28 | 1.09E-02 | 0.35 | -0.13 | 0.02 | 0.20 | NM_029852 | RIKEN cDNA 4921537D05 gene (4921537D05Rik)                                                    |
| 210 | 2.29 | 1.09E-02 | 0.95 | -0.05 | 0.01 | 0.80 | NM_025393 | S100 calcium binding protein A14 (S100a14)                                                    |
| 211 | 2.33 | 1.10E-02 | 0.28 | 0.09  | 0.00 | 0.17 | NM_146206 | two pore segment channel 2 (Tpcn2)                                                            |
| 212 | 2.37 | 1.12E-02 | 0.39 | -0.16 | 0.00 | 0.08 | NM_021468 |                                                                                               |
| 213 | 2.41 | 1.13E-02 | 0.29 | 0.04  | 0.00 | 0.49 | NM_009740 | B-cell leukemia/lymphoma 10 (Bcl10)                                                           |
| 214 | 2.42 | 1.13E-02 | 0.28 | -0.25 | 0.02 | 0.02 | NM_145070 | huntingtin interacting protein 1 related (Hip1r)                                              |
| 215 | 2.43 | 1.13E-02 | 0.34 | -0.25 | 0.00 | 0.02 | NM_026499 | splicing factor, arginine/serine-rich 6 (Sfrs6)                                               |
| 216 | 2.58 | 1.19E-02 | 0.34 | -0.03 | 0.00 | 0.69 | NM_028810 | ras homolog gene family, member E (Rhoe)                                                      |
| 217 | 2.7  | 1.24E-02 | 0.35 | -0.33 | 0.01 | 0.01 | NM_134189 | UDP-N-acetyl-alpha-D-galactosamine:polypeptide N-acetylgalactosaminyltransferase 10 (Galnt10) |
| 219 | 2.77 | 1.26E-02 | 0.29 | -0.30 | 0.00 | 0.04 | NM_007928 | MAP/microtubule affinity-regulating kinase 2 (Mark2)                                          |

|     |      |          |      |       |      |      |           |                                                                                      |
|-----|------|----------|------|-------|------|------|-----------|--------------------------------------------------------------------------------------|
| 220 | 2.77 | 1.26E-02 | 0.36 | 0.41  | 0.05 | 0.02 | NM_146006 | lanosterol synthase (Lss)                                                            |
| 218 | 2.76 | 1.27E-02 | 0.45 | 0.06  | 0.00 | 0.48 | NM_207206 | expressed sequence AI505034 (AI505034)                                               |
| 221 | 2.81 | 1.27E-02 | 0.31 | 0.09  | 0.01 | 0.92 | NM_011803 | core promoter element binding protein (Copeb)                                        |
| 222 | 2.84 | 1.28E-02 | 0.32 | -0.15 | 0.01 | 0.17 | NM_177729 | hypothetical protein 4930477M19 (4930477M19)                                         |
| 223 | 2.85 | 1.28E-02 | 0.29 | 0.78  | 0.00 | 0.00 | NM_080456 | mitochondrial ribosomal protein S6 (Mrps6)                                           |
| 224 | 2.86 | 1.28E-02 | 0.29 | -0.19 | 0.01 | 0.07 | NM_027878 | RIKEN cDNA 1200002N14 gene (1200002N14Rik)                                           |
| 225 | 3    | 1.33E-02 | 0.49 | -0.05 | 0.02 | 0.84 | NM_175003 | expressed sequence AU040829 (AU040829)                                               |
| 226 | 3.05 | 1.35E-02 | 0.38 | 0.18  | 0.00 | 0.09 | NM_023142 | actin related protein 2/3 complex, subunit 1B (Arpc1b)                               |
| 227 | 3.29 | 1.45E-02 | 0.32 | 0.08  | 0.01 | 0.39 | XM_110503 | microtubule-actin crosslinking factor 1 (Macf1)                                      |
| 228 | 3.37 | 1.48E-02 | 0.35 | -0.44 | 0.01 | 0.00 | NM_172395 | small protein effector 1 of Cdc42 (Spec1)                                            |
| 229 | 3.4  | 1.48E-02 | 0.34 | 0.09  | 0.06 | 0.42 | NM_022653 | thimet oligopeptidase 1 (Thop1)                                                      |
| 230 | 3.5  | 1.52E-02 | 0.26 | -0.16 | 0.00 | 0.00 | NM_011932 | dual adaptor for phosphotyrosine and 3-phosphoinositides 1 (Dapp1)                   |
| 231 | 3.54 | 1.53E-02 | 0.31 | -0.03 | 0.00 | 0.67 | XM_147219 | phosphomannomutase 2 (Pmm2)                                                          |
| 235 | 3.6  | 1.53E-02 | 0.27 | 0.91  | 0.00 | 0.00 | NM_023655 | tripartite motif protein 29 (Trim29)                                                 |
| 232 | 3.56 | 1.54E-02 | 0.31 | -0.24 | 0.02 | 0.19 | NM_026470 | spermatogenesis associated 6 (Spata6)                                                |
| 233 | 3.58 | 1.54E-02 | 0.82 | 0.17  | 0.04 | 0.63 | NM_009610 | actin, gamma 2, smooth muscle, enteric (Actg2)                                       |
| 234 | 3.59 | 1.54E-02 | 0.31 | 0.08  | 0.02 | 0.31 | XM_138397 |                                                                                      |
| 236 | 3.69 | 1.56E-02 | 0.28 | 0.23  | 0.01 | 0.05 | XM_127766 | RIKEN cDNA C030027K23 gene (C030027K23Rik)                                           |
| 237 | 3.72 | 1.57E-02 | 0.30 | 0.01  | 0.01 | 0.79 | NM_010194 | feline sarcoma oncogene (Fes)                                                        |
| 238 | 3.8  | 1.59E-02 | 0.27 | 0.09  | 0.00 | 0.34 | NM_146119 | RIKEN cDNA 9130404D14 gene (9130404D14Rik)                                           |
| 239 | 3.8  | 1.59E-02 | 0.36 | -0.37 | 0.05 | 0.06 | NM_009886 | cadherin EGF LAG seven-pass G-type receptor 1 (Celsr1)                               |
| 240 | 3.85 | 1.60E-02 | 0.38 | -0.04 | 0.00 | 0.71 | NM_207677 | death effector domain-containing DNA binding protein 2 (Dedd2), transcript variant 2 |
| 241 | 4    | 1.66E-02 | 0.26 | 0.14  | 0.00 | 0.18 | NM_145562 | RIKEN cDNA 9130213B05 gene (9130213B05Rik)                                           |
| 242 | 4.08 | 1.69E-02 | 0.35 | -0.19 | 0.01 | 0.08 | NM_007594 | calumenin (Calu), transcript variant 1                                               |
| 243 | 4.22 | 1.74E-02 | 0.55 | 0.27  | 0.02 | 0.14 | NM_031159 | apolipoprotein B editing complex 1 (Apobec1)                                         |
| 244 | 4.35 | 1.78E-02 | 0.31 | -0.44 | 0.01 | 0.00 | NM_053246 | downstream of tyrosine kinase 4 (Dok4)                                               |
| 245 | 4.35 | 1.78E-02 | 0.32 | -0.04 | 0.00 | 0.70 | NM_172415 | RIKEN cDNA 2810441C07 gene (2810441C07Rik)                                           |
| 246 | 4.54 | 1.85E-02 | 0.32 | -0.17 | 0.01 | 0.01 | NM_011216 | protein tyrosine phosphatase, receptor type, O (Ptpro)                               |
| 250 | 4.66 | 1.85E-02 | 0.42 | -0.52 | 0.03 | 0.03 | NM_009982 | cathepsin C (Ctsc)                                                                   |
| 251 | 4.66 | 1.85E-02 | 0.33 | -0.16 | 0.02 | 0.31 | NM_022317 | solute carrier family 28 (sodium-coupled nucleoside transporter), member 3 (Slc28a3) |
| 252 | 4.67 | 1.85E-02 | 0.32 | -0.37 | 0.02 | 0.00 | NM_008446 | kinesin family member 4 (Kif4)                                                       |
| 248 | 4.65 | 1.87E-02 | 0.29 | 0.20  | 0.00 | 0.08 | NM_009951 | insulin-like growth factor 2, binding protein 1 (Igf2bp1)                            |
| 249 | 4.65 | 1.87E-02 | 0.33 | -0.10 | 0.10 | 0.60 | NM_023214 | solute carrier family 30 (zinc transporter), member 7 (Slc30a7)                      |
| 247 | 4.64 | 1.88E-02 | 0.27 | 0.16  | 0.00 | 0.13 | NM_016920 | ATPase, H+ transporting, lysosomal V0 subunit a isoform 1 (Atp6v0a1)                 |
| 253 | 4.91 | 1.94E-02 | 0.46 | -0.06 | 0.01 | 0.70 | NM_027652 | DNA segment, Chr 5, Wayne State University 178, expressed (D5Wsu178e)                |
| 254 | 5.03 | 1.98E-02 | 0.32 | 0.02  | 0.04 | 0.82 | NM_133819 | protein phosphatase 1, regulatory (inhibitor) subunit 15b (Ppp1r15b)                 |
| 255 | 5.23 | 2.05E-02 | 0.31 | -0.03 | 0.06 | 0.88 | NM_009397 | tumor necrosis factor, alpha-induced protein 3 (Tnfaip3)                             |
| 256 | 5.46 | 2.13E-02 | 0.66 | -0.56 | 0.11 | 0.18 | NM_009252 | serine (or cysteine) proteinase inhibitor, clade A, member 3N (Serpina3n)            |
| 257 | 5.69 | 2.21E-02 | 0.35 | -0.18 | 0.01 | 0.08 | NM_024457 | RAS related protein 1b (Rap1b)                                                       |
| 258 | 5.72 | 2.22E-02 | 0.27 | 0.11  | 0.01 | 0.09 | NM_009112 | S100 calcium binding protein A10 (calpactin) (S100a10)                               |
| 259 | 5.74 | 2.22E-02 | 0.29 | -0.21 | 0.01 | 0.04 | NM_025374 | glyoxalase 1 (Glo1)                                                                  |
| 260 | 5.78 | 2.22E-02 | 0.33 | -0.39 | 0.00 | 0.00 | NM_033572 | Williams-Beuren syndrome chromosome region 16 homolog (human) (Wbscr16)              |
| 261 | 5.86 | 2.25E-02 | 0.35 | -0.39 | 0.04 | 0.08 | NM_010739 | lymphocyte antigen 64 (Ly64)                                                         |
| 264 | 6.02 | 2.28E-02 | 0.28 | 0.01  | 0.03 | 0.85 | NM_007891 | E2F transcription factor 1 (E2f1)                                                    |
| 265 | 6.03 | 2.28E-02 | 0.27 | -0.30 | 0.01 | 0.01 | NM_133803 | dipeptidylpeptidase 3 (Dpp3)                                                         |
| 263 | 6.02 | 2.29E-02 | 0.33 | -0.03 | 0.03 | 0.72 | NM_173395 | hypothetical protein 4832406C22 (4832406C22)                                         |

|     |       |          |      |       |      |      |           |                                                                                              |
|-----|-------|----------|------|-------|------|------|-----------|----------------------------------------------------------------------------------------------|
| 262 | 6.02  | 2.30E-02 | 0.26 | 0.01  | 0.00 | 0.83 | NM_009502 | vinculin (Vcl)                                                                               |
| 266 | 6.38  | 2.40E-02 | 0.26 | 0.13  | 0.01 | 0.09 | NM_013685 | transcription factor 4 (Tcf4)                                                                |
| 267 | 6.54  | 2.45E-02 | 0.27 | -0.01 | 0.01 | 0.86 | NM_007982 | PTK2 protein tyrosine kinase 2 (Ptk2)                                                        |
| 268 | 6.56  | 2.45E-02 | 0.32 | -0.14 | 0.02 | 0.33 | NM_011498 | basic helix-loop-helix domain containing, class B2 (Bhlhb2)                                  |
| 269 | 6.62  | 2.46E-02 | 0.29 | -0.14 | 0.04 | 0.30 | NM_011182 | pleckstrin homology, Sec7 and coiled-coil domains 3 (Pscd3)                                  |
| 270 | 6.66  | 2.47E-02 | 0.44 | -0.07 | 0.00 | 0.49 | NM_146217 | alanyl-tRNA synthetase (Aars)                                                                |
| 271 | 6.92  | 2.55E-02 | 0.56 | -0.33 | 0.01 | 0.02 | NM_009794 | calpain 2 (Capn2)                                                                            |
| 272 | 7     | 2.57E-02 | 0.37 | 0.09  | 0.02 | 0.42 | NM_018871 | 3-monooxygenase/tryptophan 5-monooxygenase activation protein, gamma polypeptide (Ywhag)     |
| 273 | 7.1   | 2.60E-02 | 0.26 | -0.03 | 0.00 | 0.48 | NM_031170 | keratin complex 2, basic, gene 8 (Krt2-8)                                                    |
| 274 | 7.16  | 2.61E-02 | 0.39 | -0.32 | 0.01 | 0.01 | NM_138952 | receptor (TNFRSF)-interacting serine-threonine kinase 2 (Ripk2)                              |
| 275 | 7.53  | 2.74E-02 | 0.52 | -0.31 | 0.05 | 0.21 | NM_130886 | caspase recruitment domain family, member 14 (Card14)                                        |
| 276 | 7.76  | 2.81E-02 | 0.35 | -0.12 | 0.02 | 0.36 | XM_130985 |                                                                                              |
| 277 | 7.78  | 2.81E-02 | 0.35 | 0.09  | 0.16 | 0.69 | NM_008885 | peripheral myelin protein (Pmp22)                                                            |
| 278 | 7.9   | 2.84E-02 | 0.28 | -0.38 | 0.00 | 0.00 | NM_028023 | cell division cycle associated 4 (Cdca4)                                                     |
| 279 | 8     | 2.87E-02 | 0.46 | -0.07 | 0.11 | 0.88 | NM_028031 | zinc finger, DHHC domain containing 13 (Zdhhc13)                                             |
| 280 | 8.06  | 2.88E-02 | 0.32 | -0.20 | 0.02 | 0.12 | NM_139198 | placenta-specific 8 (Plac8)                                                                  |
| 281 | 8.11  | 2.89E-02 | 0.24 | 0.16  | 0.00 | 0.01 | NM_174850 | RIKEN cDNA A930021H16 gene (A930021H16Rik)                                                   |
| 283 | 8.3   | 2.93E-02 | 0.37 | -0.14 | 0.02 | 0.29 | NM_028965 | sorting nexin 11 (Snx11)                                                                     |
| 282 | 8.3   | 2.94E-02 | 0.25 | -0.10 | 0.00 | 0.08 | NM_178884 | expressed sequence AW822216 (AW822216)                                                       |
| 284 | 8.34  | 2.94E-02 | 0.24 | 0.04  | 0.01 | 0.49 | NM_008556 | phosphoprotein enriched in astrocytes 15 (Pea15)                                             |
| 286 | 8.5   | 2.97E-02 | 0.33 | 0.23  | 0.03 | 0.22 | NM_008808 | platelet derived growth factor, alpha (Pdgfa)                                                |
| 285 | 8.49  | 2.98E-02 | 1.07 | 0.16  | 0.07 | 0.59 | NM_010742 | lymphocyte antigen 6 complex, locus D (Ly6d)                                                 |
| 287 | 8.6   | 3.00E-02 | 0.51 | -0.13 | 0.03 | 0.48 | XM_127496 | 3-hydroxy-3-methylglutaryl-Coenzyme A reductase (Hmgcr)                                      |
| 288 | 8.87  | 3.08E-02 | 0.34 | -0.06 | 0.01 | 0.56 | NM_009627 | adrenomedullin (Adm)                                                                         |
| 289 | 9.12  | 3.16E-02 | 0.26 | -0.27 | 0.00 | 0.01 | NM_009045 | v-rel reticuloendotheliosis viral oncogene homolog A (avian) (Rela)                          |
| 290 | 9.21  | 3.17E-02 | 0.25 | -0.14 | 0.01 | 0.06 | NM_011313 | S100 calcium binding protein A6 (calcylin) (S100a6)                                          |
| 291 | 9.87  | 3.39E-02 | 0.36 | -0.10 | 0.03 | 0.58 | NM_144862 | LIM and senescent cell antigen like domains 2 (Lims2)                                        |
| 292 | 10.01 | 3.43E-02 | 0.24 | -0.01 | 0.00 | 0.91 | NM_133801 | general transcription factor IIF, polypeptide 1 (Gtf2f1)                                     |
| 293 | 10.27 | 3.50E-02 | 0.23 | -0.18 | 0.03 | 0.08 | NM_146191 | leucine-rich repeat kinase 1 (Lrrk1)                                                         |
| 294 | 10.66 | 3.63E-02 | 0.26 | -0.30 | 0.01 | 0.01 | NM_183016 | Cdc42 binding protein kinase beta (Cdc42bpb)                                                 |
| 295 | 10.93 | 3.70E-02 | 0.35 | -0.10 | 0.10 | 0.66 | NM_008105 | glucosaminyl (N-acetyl) transferase 2, I-branching enzyme (Gcnt2), transcript variant 3      |
| 296 | 10.97 | 3.71E-02 | 0.24 | -0.03 | 0.00 | 0.21 | NM_174997 | cDNA sequence BC043098 (BC043098)                                                            |
| 297 | 11.01 | 3.71E-02 | 0.26 | 0.24  | 0.02 | 0.03 | NM_007871 | dynamitin 2 (Dnm2)                                                                           |
| 298 | 11.12 | 3.73E-02 | 0.26 | -0.10 | 0.01 | 0.16 | NM_018872 | DNA segment, Chr 1, Brigham & Womens Genetics 0491 expressed (D1Bwg0491e)                    |
| 299 | 11.39 | 3.81E-02 | 0.44 | -0.39 | 0.00 | 0.01 | NM_007875 | dolichyl-phosphate (UDP-N-acetylglucosamine) acetylglucosaminophosphotransferase 1 (Dpagt1)  |
| 300 | 11.63 | 3.88E-02 | 0.27 | -0.15 | 0.01 | 0.18 | NM_010581 | CD47 antigen (Rh-related antigen, integrin-associated signal transducer) (Cd47)              |
| 301 | 12.38 | 4.11E-02 | 0.32 | 0.07  | 0.01 | 0.47 | XM_203312 | syntaxin 11 (Stx11)                                                                          |
| 302 | 12.82 | 4.25E-02 | 0.32 | 0.16  | 0.02 | 0.32 | NM_010052 | delta-like 1 homolog (Drosophila) (Dlk1)                                                     |
| 303 | 13.04 | 4.30E-02 | 0.27 | -0.09 | 0.02 | 0.31 | NM_148929 | solute carrier family 9 (sodium/hydrogen exchanger), member 8 (Slc9a8), transcript variant 1 |
| 304 | 13.11 | 4.31E-02 | 0.24 | -0.05 | 0.00 | 0.36 | NM_019987 | intestinal cell kinase (Ick)                                                                 |
| 305 | 13.25 | 4.35E-02 | 0.24 | -0.01 | 0.01 | 0.86 | NM_010579 | integrin beta 4 binding protein (Itgb4bp)                                                    |
| 306 | 13.45 | 4.40E-02 | 0.28 | -0.28 | 0.06 | 0.06 | NM_144904 | ROD1 regulator of differentiation 1 (S. pombe) (Rod1)                                        |
| 307 | 13.6  | 4.43E-02 | 0.24 | -0.18 | 0.00 | 0.00 | NM_138673 | stabilin 2 (Stab2)                                                                           |
| 309 | 13.75 | 4.45E-02 | 0.34 | 0.41  | 0.01 | 0.00 | NM_008135 | solute carrier family 6 (neurotransmitter transporter, glycine), member 9 (Slc6a9)           |
| 310 | 13.79 | 4.45E-02 | 0.23 | -0.31 | 0.01 | 0.00 | NM_022993 | low-density lipoprotein receptor-related protein 10 (Lrp10)                                  |
| 308 | 13.74 | 4.46E-02 | 0.29 | -0.22 | 0.00 | 0.08 | NM_020042 | molybdenum cofactor synthesis 1 (Mocs1), transcript variant 1                                |

|     |       |          |      |       |      |      |           |                                                                                                         |
|-----|-------|----------|------|-------|------|------|-----------|---------------------------------------------------------------------------------------------------------|
| 311 | 13.95 | 4.49E-02 | 0.23 | -0.27 | 0.00 | 0.01 | NM_016742 | cell division cycle 37 homolog ( <i>S. cerevisiae</i> ) (Cdc37)                                         |
| 312 | 14.27 | 4.57E-02 | 0.40 | 0.13  | 0.02 | 0.35 | NM_010664 | keratin complex 1, acidic, gene 18 (Krt1-18)                                                            |
| 313 | 14.36 | 4.57E-02 | 0.35 | 0.10  | 0.00 | 0.39 | XM_139474 | activating transcription factor 4 (Atf4)                                                                |
| 314 | 14.36 | 4.57E-02 | 0.29 | -0.09 | 0.01 | 0.15 | NM_134131 | tumor necrosis factor, alpha-induced protein 8 (Tnfaip8)                                                |
| 315 | 14.62 | 4.64E-02 | 0.38 | 0.23  | 0.01 | 0.15 | XM_134537 | RIKEN cDNA 2310061F22 gene (2310061F22Rik)                                                              |
| 318 | 14.91 | 4.67E-02 | 0.42 | 0.26  | 0.03 | 0.15 | NM_175270 | RIKEN cDNA 5730467H21 gene (5730467H21Rik)                                                              |
| 319 | 14.91 | 4.67E-02 | 0.24 | 0.05  | 0.04 | 0.58 | NM_028733 | protein kinase C and casein kinase substrate in neurons 3 (Pacsin3)                                     |
| 317 | 14.89 | 4.70E-02 | 0.24 | 0.11  | 0.00 | 0.25 | NM_022009 | flightless I homolog ( <i>Drosophila</i> ) (Fliih)                                                      |
| 320 | 15.04 | 4.70E-02 | 0.27 | -0.36 | 0.04 | 0.01 | NM_029554 | RIKEN cDNA 0610040J01 gene (0610040J01Rik)                                                              |
| 321 | 15.07 | 4.70E-02 | 0.34 | -0.29 | 0.01 | 0.01 | NM_011715 | WD repeat domain 1 (Wdr1)                                                                               |
| 316 | 14.87 | 4.71E-02 | 0.27 | -0.13 | 0.10 | 0.40 | NM_008567 | minichromosome maintenance deficient 6 (MIS5 homolog, <i>S. pombe</i> ) ( <i>S. cerevisiae</i> ) (Mcm6) |
| 322 | 15.3  | 4.75E-02 | 0.24 | -0.24 | 0.00 | 0.01 | NM_080553 | inositol 1,4,5-triphosphate receptor 3 (Itpr3)                                                          |
| 323 | 15.5  | 4.80E-02 | 0.25 | -0.07 | 0.02 | 0.42 | NM_134099 | F-box only protein 4 (Fbxo4)                                                                            |
| 324 | 15.54 | 4.80E-02 | 0.22 | 0.19  | 0.04 | 0.29 | NM_053072 | FYVE, RhoGEF and PH domain containing 6 (Fgd6)                                                          |
| 325 | 15.64 | 4.81E-02 | 0.24 | 0.06  | 0.03 | 0.70 | NM_007924 | elongation factor RNA polymerase II (EII)                                                               |
| 326 | 16.17 | 4.96E-02 | 0.45 | -0.24 | 0.07 | 0.28 | NM_008565 | minichromosome maintenance deficient 4 homolog ( <i>S. cerevisiae</i> ) (Mcm4)                          |
| 327 | 16.31 | 4.99E-02 | 0.28 | -0.23 | 0.05 | 0.03 | NM_010838 | microtubule-associated protein tau (Mapt)                                                               |
| 328 | 16.35 | 4.99E-02 | 0.56 | 0.07  | 0.06 | 0.67 | XM_124389 | chloride intracellular channel 4 (mitochondrial) (Clc4)                                                 |
